# Supplementary material for: Computational identification and analysis of signaling subnetworks with distinct functional roles in the regulation of TNF production
Source: Royal Society of Chemistry journal article supplement (doi:10.1039/c5mb00456j), 2016-01-04
Supplement: c5mb00456j2.pdf [file c5mb00456j2.pdf]

## **Electronic Supplementary Information (ESI)**

### **“Computational modeling reveals signaling subnetworks with distinct functional roles in the regulation of TNF production”**

by Maurizio Tomaiuolo, Melissa Kottke, Ronald W. Matheny Jr., Jaques Reifman,\*  
and Alexander Y. Mitrophanov

#### **Contents**

**1. Supplementary Tables S1-S3**

**2. Supplementary Figures S1-S9**

**3. MATLAB Code Description**

## 1. Supplementary Tables

**Table S1.** Model reactions and parameters. Parameter names in the table are the same as in the MATLAB code. The numbers in parentheses in the right-most column are the literature references (see the end of this document) for the corresponding parameter values.

| <b><i>IκB and NFκB Cellular Localization Reactions</i></b>            |                                                                                 |           |                      |                                    |                      |              |                        |
|-----------------------------------------------------------------------|---------------------------------------------------------------------------------|-----------|----------------------|------------------------------------|----------------------|--------------|------------------------|
| #                                                                     | Reaction                                                                        | Parameter |                      |                                    | Category             | Localization | Parameter value source |
|                                                                       |                                                                                 | Name      | Value                | Unit                               |                      |              |                        |
| 1                                                                     | $I\kappa B\alpha \rightarrow I\kappa B\alpha_n$                                 | in_a      | $9 \times 10^{-2}$   | $\text{min}^{-1}$                  | Import               | Undefined    | (1)                    |
| 2                                                                     | $I\kappa B\epsilon \rightarrow I\kappa B\epsilon_n$                             | in_e      | $4.5 \times 10^{-2}$ | $\text{min}^{-1}$                  | Import               | Undefined    | (1)                    |
| 3                                                                     | $I\kappa B\alpha_n \rightarrow I\kappa B\alpha$                                 | ex_a      | $1.2 \times 10^{-2}$ | $\text{min}^{-1}$                  | Export               | Undefined    | (1)                    |
| 4                                                                     | $I\kappa B\epsilon_n \rightarrow I\kappa B\epsilon$                             | ex_e      | $1.2 \times 10^{-2}$ | $\text{min}^{-1}$                  | Export               | Undefined    | (1)                    |
| 5                                                                     | $NF\kappa B I\kappa B\alpha \rightarrow NF\kappa B I\kappa B\alpha_n$           | in_2an    | 0.276                | $\text{min}^{-1}$                  | Import               | Undefined    | (1)                    |
| 6                                                                     | $NF\kappa B I\kappa B\epsilon \rightarrow NF\kappa B I\kappa B\epsilon_n$       | in_2en    | 0.138                | $\text{min}^{-1}$                  | Import               | Undefined    | (1)                    |
| 7                                                                     | $NF\kappa B I\kappa B\alpha_n \rightarrow NF\kappa B I\kappa B\alpha$           | ex_2an    | 0.828                | $\text{min}^{-1}$                  | Export               | Undefined    | (1)                    |
| 8                                                                     | $NF\kappa B I\kappa B\epsilon_n \rightarrow NF\kappa B I\kappa B\epsilon$       | ex_2en    | 0.414                | $\text{min}^{-1}$                  | Export               | Undefined    | (1)                    |
| 9                                                                     | $NF\kappa B \rightarrow NF\kappa B_n$                                           | in_n      | 5.4                  | $\text{min}^{-1}$                  | Import               | Undefined    | (1)                    |
| 10                                                                    | $NF\kappa B_n \rightarrow NF\kappa B$                                           | ex_n      | $4.8 \times 10^{-3}$ | $\text{min}^{-1}$                  | Export               | Undefined    | (1)                    |
| <b><i>IκB Protein Degradation Reactions</i></b>                       |                                                                                 |           |                      |                                    |                      |              |                        |
| 11                                                                    | $I\kappa B\alpha_n \rightarrow \emptyset$                                       | pd_n_a    | $1.2 \times 10^{-2}$ | $\text{min}^{-1}$                  | Protein degradation  | Nucleus      | (1)                    |
| 12                                                                    | $I\kappa B\epsilon_n \rightarrow \emptyset$                                     | pd_n_e    | 0.18                 | $\text{min}^{-1}$                  | Protein degradation  | Nucleus      | (1)                    |
| 13                                                                    | $NF\kappa B I\kappa B\alpha_n \rightarrow \emptyset$                            | pd_n_2an  | $6 \times 10^{-5}$   | $\text{min}^{-1}$                  | Protein degradation  | Nucleus      | (1)                    |
| 14                                                                    | $NF\kappa B I\kappa B\epsilon_n \rightarrow \emptyset$                          | pd_n_2en  | $6 \times 10^{-5}$   | $\text{min}^{-1}$                  | Protein degradation  | Nucleus      | (1)                    |
| 15                                                                    | $NF\kappa B I\kappa B\alpha \rightarrow \emptyset$                              | pd_c_2an  | $6 \times 10^{-5}$   | $\text{min}^{-1}$                  | Protein degradation  | Cytoplasm    | (1)                    |
| 16                                                                    | $NF\kappa B I\kappa B\epsilon \rightarrow \emptyset$                            | pd_c_2en  | $6 \times 10^{-5}$   | $\text{min}^{-1}$                  | Protein degradation  | Cytoplasm    | (1)                    |
| <b><i>IκB:NFκB Association and Dissociation Reactions</i></b>         |                                                                                 |           |                      |                                    |                      |              |                        |
| 17                                                                    | $NF\kappa B + I\kappa B\alpha \rightarrow NF\kappa B I\kappa B\alpha$           | a_c_an    | 30                   | $\mu\text{M}^{-1} \text{min}^{-1}$ | Association          | Cytoplasm    | (1)                    |
| 18                                                                    | $NF\kappa B + I\kappa B\epsilon \rightarrow NF\kappa B I\kappa B\epsilon$       | a_c_en    | 30                   | $\mu\text{M}^{-1} \text{min}^{-1}$ | Association          | Cytoplasm    | (1)                    |
| 19                                                                    | $NF\kappa B_n + I\kappa B\alpha_n \rightarrow NF\kappa B I\kappa B\alpha_n$     | a_n_an    | 30                   | $\mu\text{M}^{-1} \text{min}^{-1}$ | Association          | Nucleus      | (1)                    |
| 20                                                                    | $NF\kappa B_n + I\kappa B\epsilon_n \rightarrow NF\kappa B I\kappa B\epsilon_n$ | a_n_en    | 30                   | $\mu\text{M}^{-1} \text{min}^{-1}$ | Association          | Nucleus      | (1)                    |
| 21                                                                    | $NF\kappa B I\kappa B\alpha \rightarrow NF\kappa B + I\kappa B\alpha$           | d_c_an    | $6 \times 10^{-5}$   | $\text{min}^{-1}$                  | Dissociation         | Cytoplasm    | (1)                    |
| 22                                                                    | $NF\kappa B I\kappa B\epsilon \rightarrow NF\kappa B + I\kappa B\epsilon$       | d_c_en    | $6 \times 10^{-5}$   | $\text{min}^{-1}$                  | Dissociation         | Cytoplasm    | (1)                    |
| 23                                                                    | $NF\kappa B I\kappa B\alpha_n \rightarrow NF\kappa B_n + I\kappa B\alpha_n$     | d_n_an    | $6 \times 10^{-5}$   | $\text{min}^{-1}$                  | Dissociation         | Nucleus      | (1)                    |
| 24                                                                    | $NF\kappa B I\kappa B\epsilon_n \rightarrow NF\kappa B_n + I\kappa B\epsilon_n$ | d_n_en    | $6 \times 10^{-5}$   | $\text{min}^{-1}$                  | Dissociation         | Nucleus      | (1)                    |
| <b><i>IKK-mediated IκB Degradation Reactions</i></b>                  |                                                                                 |           |                      |                                    |                      |              |                        |
| 25                                                                    | $IKK + I\kappa B\alpha \rightarrow IKK$                                         | pd_c_2ai  | 1.8                  | $\mu\text{M}^{-1} \text{min}^{-1}$ | Protein degradation  | Cytoplasm    | Modified from (1)      |
| 26                                                                    | $IKK + I\kappa B\epsilon \rightarrow IKK$                                       | pd_c_2ei  | 0.9                  | $\mu\text{M}^{-1} \text{min}^{-1}$ | Protein degradation  | Cytoplasm    | Modified from (1)      |
| 27                                                                    | $IKK + NF\kappa B I\kappa B\alpha_n \rightarrow IKK + NF\kappa B$               | pd_c_3ain | 1.8                  | $\mu\text{M}^{-1} \text{min}^{-1}$ | Protein degradation  | Cytoplasm    | Modified from (1)      |
| 28                                                                    | $IKK + NF\kappa B I\kappa B\epsilon_n \rightarrow IKK + NF\kappa B$             | pd_c_3ain | 0.9                  | $\mu\text{M}^{-1} \text{min}^{-1}$ | Protein degradation  | Cytoplasm    | Modified from (1)      |
| <b><i>Volume Ratio and Gene Transcription Function Parameters</i></b> |                                                                                 |           |                      |                                    |                      |              |                        |
| 29                                                                    |                                                                                 | cnvr      | 3                    | Dimensionless                      | Cytoplasm to nucleus | Undefined    | (2)                    |

|                                                         |                                                                          |                  |                      |                   |                                 |           |                   |
|---------------------------------------------------------|--------------------------------------------------------------------------|------------------|----------------------|-------------------|---------------------------------|-----------|-------------------|
|                                                         |                                                                          |                  |                      |                   | volume ratio                    |           |                   |
| 30                                                      |                                                                          | mmVmax           | 2                    | $\mu\text{M}$     | Maximum gene transcription rate | Undefined | Assumed           |
| 31                                                      |                                                                          | mmKm             | 0.15                 | $\mu\text{M}$     | Michaelis constant              | Undefined | Assumed           |
| 32                                                      |                                                                          | mmHc             | 1                    | Dimensionless     | Hill coefficient                | Undefined | Assumed           |
| 33                                                      |                                                                          | $a_{\text{rep}}$ | 0.1                  | Dimensionless     | Repressor function constant     | Undefined | Assumed           |
| 34                                                      |                                                                          | $b_{\text{rep}}$ | 0.006                | $\mu\text{M}$     | Repressor function constant     | Undefined | Assumed           |
| 35                                                      |                                                                          | $k_{\text{rep}}$ | 0.006                | $\mu\text{M}$     | Inhibition strength             | Undefined | Assumed           |
| <b><i>IkBa mRNA and Protein Synthesis Reactions</i></b> |                                                                          |                  |                      |                   |                                 |           |                   |
| 36                                                      | NFkBn $\rightarrow$ NFkBn + pre-IkBat                                    | prs_an           | $5 \times 10^{-3}$   | $\text{min}^{-1}$ | NFkB induced pre-mRNA synthesis | Nucleus   | Fitted            |
| 37                                                      | pre-IkBat $\rightarrow \emptyset$                                        | prd_a            | 0                    | $\text{min}^{-1}$ | pre-mRNA degradation            | Nucleus   | Assumed           |
| 38                                                      | pre-IkBat + Spliceosome $\rightarrow$ pre-IkBat:Spliceosome <sup>*</sup> | a_n_spa          | 10                   | $\text{min}^{-1}$ | Spliceosome association         | Nucleus   | Fitted            |
| 39                                                      | $\emptyset \rightarrow$ pre-IkBat                                        | prs_a            | $7 \times 10^{-5}$   | $\text{min}^{-1}$ | pre-mRNA constitutive synthesis | Nucleus   | (1)               |
| 40                                                      | pre-IkBat: Spliceosome $\rightarrow$ IkBat + Spliceosome <sup>*</sup>    | rs_a             | 10                   | $\text{min}^{-1}$ | Mature mRNA release             | Nucleus   | Fitted            |
| 41                                                      | IkBat $\rightarrow \emptyset$                                            | rd_a             | $3.5 \times 10^{-2}$ | $\text{min}^{-1}$ | mRNA degradation                | Cytoplasm | (1)               |
| 42                                                      | IkBat $\rightarrow$ IkBa                                                 | ps_c_a           | 0.25                 | $\text{min}^{-1}$ | Protein synthesis               | Cytoplasm | (1)               |
| 43                                                      | IkBa $\rightarrow \emptyset$                                             | pd_c_a           | 0.12                 | $\text{min}^{-1}$ | Protein degradation             | Cytoplasm | (1)               |
| <b><i>IkBe mRNA and Protein Synthesis Reactions</i></b> |                                                                          |                  |                      |                   |                                 |           |                   |
| 44                                                      | NFkBn $\rightarrow$ NFkBn + pre-IkBet                                    | prs_en           | $6 \times 10^{-3}$   | $\text{min}^{-1}$ | NFkB induced pre-mRNA synthesis | Nucleus   | Fitted            |
| 45                                                      | pre-IkBet $\rightarrow \emptyset$                                        | prd_e            | 0                    | $\text{min}^{-1}$ | pre-mRNA degradation            | Nucleus   | Assumed           |
| 46                                                      | pre-IkBet + Spliceosome $\rightarrow$ pre-IkBet:Spliceosome <sup>*</sup> | a_n_spe          | 10                   | $\text{min}^{-1}$ | Spliceosome association         | Nucleus   | Fitted            |
| 47                                                      | $\emptyset \rightarrow$ pre-IkBet                                        | prs_e            | $1 \times 10^{-6}$   | $\text{min}^{-1}$ | pre-mRNA basal synthesis        | Nucleus   | (1)               |
| 48                                                      | pre-IkBet: Spliceosome $\rightarrow$ IkBet + Spliceosome <sup>*</sup>    | rs_e             | 0.1                  | $\text{min}^{-1}$ | Mature mRNA release             | Nucleus   | Fitted            |
| 49                                                      | IkBet $\rightarrow \emptyset$                                            | rd_e             | $4 \times 10^{-3}$   | $\text{min}^{-1}$ | mRNA degradation                | Cytoplasm | (1)               |
| 50                                                      | IkBet $\rightarrow$ IkBe                                                 | ps_c_e           | $2.5 \times 10^{-2}$ | $\text{min}^{-1}$ | Protein synthesis               | Cytoplasm | (1)               |
| 51                                                      | IkBe $\rightarrow \emptyset$                                             | pd_c_e           | 0.18                 | $\text{min}^{-1}$ | Protein degradation             | Cytoplasm | (1)               |
| <b><i>A20 mRNA and Protein Synthesis Reactions</i></b>  |                                                                          |                  |                      |                   |                                 |           |                   |
| 52                                                      | NFkBn $\rightarrow$ NFkBn + pre-A20t                                     | prs_a20n         | $3 \times 10^{-4}$   | $\text{min}^{-1}$ | NFkB induced pre-mRNA synthesis | Nucleus   | Fitted            |
| 53                                                      | pre-A20t $\rightarrow \emptyset$                                         | prd_a20          | 0                    | $\text{min}^{-1}$ | pre-mRNA degradation            | Nucleus   | Assumed           |
| 54                                                      | pre-A20t + Spliceosome $\rightarrow$ pre-A20t:Spliceosome <sup>*</sup>   | a_n_spa20        | 10                   | $\text{min}^{-1}$ | Spliceosome association         | Nucleus   | Fitted            |
| 55                                                      | $\emptyset \rightarrow$ pre-A20t                                         | prs_a20          | 0                    | $\text{min}^{-1}$ | pre-mRNA basal synthesis        | Nucleus   | Modified from (1) |
| 56                                                      | pre-A20t: Spliceosome $\rightarrow$ A20t + Spliceosome <sup>*</sup>      | rs_a20           | $5 \times 10^{-3}$   | $\text{min}^{-1}$ | Mature mRNA                     | Nucleus   | Fitted            |

|                                                           |                                                              |           |                      |                   |                                 |               |         |
|-----------------------------------------------------------|--------------------------------------------------------------|-----------|----------------------|-------------------|---------------------------------|---------------|---------|
|                                                           |                                                              |           |                      |                   | release                         |               |         |
| 57                                                        | A20t → ∅                                                     | rd_a20    | $3.5 \times 10^{-2}$ | min <sup>-1</sup> | mRNA degradation                | Cytoplasm     | (1)     |
| 58                                                        | A20t → A20                                                   | ps_c_a20  | 0.2                  | min <sup>-1</sup> | Protein synthesis               | Cytoplasm     | (1)     |
| 59                                                        | A20 → ∅                                                      | pd_c_a20  | $2.9 \times 10^{-3}$ | min <sup>-1</sup> | Protein degradation             | Cytoplasm     | (1)     |
| <b>TNF mRNA, Protein Synthesis and Export Reactions</b>   |                                                              |           |                      |                   |                                 |               |         |
| 60                                                        | NFkBn → NFkBn + pre-TNFt                                     | prs_t     | $1.6 \times 10^{-2}$ | min <sup>-1</sup> | NFkB induced pre-mRNA synthesis | Nucleus       | Fitted  |
| 61                                                        | Pre-TNFt → ∅                                                 | prd_t     | 0                    | min <sup>-1</sup> | pre-mRNA degradation            | Nucleus       | Assumed |
| 62                                                        | pre-TNFt + Spliceosome → pre-TNFt:Spliceosome <sup>*</sup>   | a_n_spt   | 10                   | min <sup>-1</sup> | Spliceosome association         | Nucleus       | Fitted  |
| 63                                                        | pre-TNFt: Spliceosome → TNFt + Spliceosome <sup>*</sup>      | rs_t      | 10                   | min <sup>-1</sup> | Mature mRNA release             | Nucleus       | Fitted  |
| 64                                                        | TNFt → ∅                                                     | rd_t      | $1.4 \times 10^{-2}$ | min <sup>-1</sup> | mRNA degradation                | Cytoplasm     | (3)     |
| 65                                                        | TNFt → TNF                                                   | ps_c_t    | 1.1                  | min <sup>-1</sup> | Protein synthesis               | Cytoplasm     | Fitted  |
| 66                                                        | TNF → ∅                                                      | pd_c_t    | $3 \times 10^{-3}$   | min <sup>-1</sup> | Protein degradation             | Cytoplasm     | (2)     |
| 67                                                        | TNF → TNFe                                                   | ex_tnf    | $1.5 \times 10^{-4}$ | min <sup>-1</sup> | Export                          |               | (2)     |
| 68                                                        | TNFe → ∅                                                     | pd_e_t    | $5 \times 10^{-4}$   | min <sup>-1</sup> | Protein degradation             | Extracellular | (4)     |
| <b>IFN-β mRNA, Protein Synthesis and Export Reactions</b> |                                                              |           |                      |                   |                                 |               |         |
| 69                                                        | pIRF3n → pIRF3n + pre-IFNt                                   | prs_i     | $1 \times 10^{-2}$   | min <sup>-1</sup> | IRF3 induced pre-mRNA synthesis | Nucleus       | Fitted  |
| 70                                                        | pre-IFNt → ∅                                                 | prd_ifn   | 0                    | min <sup>-1</sup> | pre-mRNA degradation            | Nucleus       | Assumed |
| 71                                                        | pre-IFNt + Spliceosome → pre-IFNt:Spliceosome <sup>*</sup>   | a_n_spifn | 10                   | min <sup>-1</sup> | Spliceosome association         | Nucleus       | Fitted  |
| 72                                                        | pre-IFNt: Spliceosome → IFNt + Spliceosome <sup>*</sup>      | rs_ifn    | 10                   | min <sup>-1</sup> | Mature mRNA release             | Nucleus       | Fitted  |
| 73                                                        | IFNt → ∅                                                     | rd_ifn    | $1.5 \times 10^{-2}$ | min <sup>-1</sup> | mRNA degradation                | Cytoplasm     | Fitted  |
| 74                                                        | IFNt → IFN                                                   | ps_c_ifn  | $5 \times 10^{-2}$   | min <sup>-1</sup> | Protein synthesis               | Cytoplasm     | Fitted  |
| 75                                                        | IFN → ∅                                                      | pd_c_ifn  | $1.9 \times 10^{-2}$ | min <sup>-1</sup> | Protein degradation             | Cytoplasm     | Fitted  |
| 76                                                        | IFN → IFNe                                                   | ex_ifn    | $1 \times 10^{-2}$   | min <sup>-1</sup> | Export                          |               | Fitted  |
| 77                                                        | IFNe → ∅                                                     | pd_e_ifn  | $2.5 \times 10^{-3}$ | min <sup>-1</sup> | Protein degradation             | Extracellular | Fitted  |
| <b>IL-10 mRNA, Protein Synthesis and Export Reactions</b> |                                                              |           |                      |                   |                                 |               |         |
| 78                                                        | pCREBn → pCREBn + pre-IL10t                                  | prs_il    | $7 \times 10^{-3}$   | min <sup>-1</sup> | IRF3 induced pre-mRNA synthesis | Nucleus       | Fitted  |
| 79                                                        | pre-IL10t → ∅                                                | prd_il    | 0                    | min <sup>-1</sup> | pre-mRNA degradation            | Nucleus       | Assumed |
| 80                                                        | pre-IL10t + Spliceosome → pre-IL10t:Spliceosome <sup>*</sup> | a_n_spil  | 10                   | min <sup>-1</sup> | Spliceosome association         | Nucleus       | Fitted  |
| 81                                                        | pre-IL10t: Spliceosome → IL10t + Spliceosome <sup>*</sup>    | rs_il     | 10                   | min <sup>-1</sup> | Mature mRNA release             | Nucleus       | Fitted  |
| 82                                                        | IL10t → ∅                                                    | rd_il     | $5 \times 10^{-2}$   | min <sup>-1</sup> | mRNA degradation                | Cytoplasm     | Fitted  |
| 83                                                        | IL10t → IL10                                                 | ps_c_il   | $7 \times 10^{-2}$   | min <sup>-1</sup> | Protein synthesis               | Cytoplasm     | Fitted  |
| 84                                                        | IL10 → ∅                                                     | pd_c_il   | $2 \times 10^{-3}$   | min <sup>-1</sup> | Protein degradation             | Cytoplasm     | Fitted  |
| 85                                                        | IL10 → IL10e                                                 | ex_il     | $1.5 \times 10^{-4}$ | min <sup>-1</sup> | Export                          |               | Fitted  |
| 86                                                        | IL10e → ∅                                                    | pd_e_il   | $7 \times 10^{-5}$   | min <sup>-1</sup> | Protein degradation             | Extracellular | Fitted  |
| <b>DUSP1 mRNA and Protein Synthesis</b>                   |                                                              |           |                      |                   |                                 |               |         |
| 87                                                        | pATF1n → pATF1n + pre-DUSP1t                                 | prs_du    | $1 \times 10^{-3}$   | min <sup>-1</sup> | ATF induced pre-                | Nucleus       | Fitted  |

|                                                              |                                                               |           |                               |                                         |                                |           |                       |
|--------------------------------------------------------------|---------------------------------------------------------------|-----------|-------------------------------|-----------------------------------------|--------------------------------|-----------|-----------------------|
|                                                              |                                                               |           |                               |                                         | mRNA synthesis                 |           |                       |
| 88                                                           | pre-DUSP1t $\rightarrow$ $\emptyset$                          | prd_du    | 0                             | min <sup>-1</sup>                       | pre-mRNA degradation           | Nucleus   | Assumed               |
| 89                                                           | pre-DUSP1t + Spliceosome $\rightarrow$ pre-DUSP1t:Spliceosome | a_n_spdu  | 10                            | min <sup>-1</sup>                       | Spliceosome association        | Nucleus   | Fitted                |
| 90                                                           | pre-DUSP1t: Spliceosome $\rightarrow$ DUSP1t + Spliceosome    | rs_du     | 10                            | min <sup>-1</sup>                       | Mature mRNA release            | Nucleus   | Fitted                |
| 91                                                           | DUSP1t $\rightarrow$ $\emptyset$                              | rd_du     | 1 $\times$ 10 <sup>-2</sup>   | min <sup>-1</sup>                       | mRNA degradation               | Cytoplasm | Fitted                |
| 92                                                           | DUSP1t $\rightarrow$ DUSP1                                    | ps_c_du   | 2 $\times$ 10 <sup>-2</sup>   | min <sup>-1</sup>                       | Protein synthesis              | Cytoplasm | Fitted                |
| 93                                                           | DUSP1 $\rightarrow$ $\emptyset$                               | pd_c_du   | 3 $\times$ 10 <sup>-3</sup>   | min <sup>-1</sup>                       | Protein degradation            | Cytoplasm | Fitted                |
| <b>REpressor mRNA and Protein Synthesis</b>                  |                                                               |           |                               |                                         |                                |           |                       |
| 94                                                           | pSTAT3n $\rightarrow$ pSTAT3n + pre-REPt                      | prs_re    | 5 $\times$ 10 <sup>-4</sup>   | min <sup>-1</sup>                       | ATF induced pre-mRNA synthesis | Nucleus   | Fitted                |
| 95                                                           | pre-REPt $\rightarrow$ $\emptyset$                            | prd_re    | 0                             | min <sup>-1</sup>                       | pre-mRNA degradation           | Nucleus   | Assumed               |
| 96                                                           | pre-REPt + Spliceosome $\rightarrow$ pre-REPt:Spliceosome     | a_n_spre  | 10                            | min <sup>-1</sup>                       | Spliceosome association        | Nucleus   | Fitted                |
| 97                                                           | pre-REPt: Spliceosome $\rightarrow$ REPt + Spliceosome        | rs_re     | 10                            | min <sup>-1</sup>                       | Mature mRNA release            | Nucleus   | Fitted                |
| 98                                                           | REPt $\rightarrow$ $\emptyset$                                | rd_re     | 1 $\times$ 10 <sup>-2</sup>   | min <sup>-1</sup>                       | mRNA degradation               | Cytoplasm | Fitted                |
| 99                                                           | REPt $\rightarrow$ REP                                        | ps_c_re   | 1 $\times$ 10 <sup>-3</sup>   | min <sup>-1</sup>                       | Protein synthesis              | Cytoplasm | Fitted                |
| 100                                                          | REP $\rightarrow$ $\emptyset$                                 | pd_c_re   | 1 $\times$ 10 <sup>-3</sup>   | min <sup>-1</sup>                       | Protein degradation            | Cytoplasm | Fitted                |
| <b>IKK activation and inactivation reactions</b>             |                                                               |           |                               |                                         |                                |           |                       |
| 101                                                          | IKKne + TAK1a $\rightarrow$ TAK1a + IKKa                      | ka        | 1                             | $\mu$ M <sup>-1</sup> min <sup>-1</sup> | Kinase activation              | Cytoplasm | Fitted                |
| 102                                                          | IKKa + A20 $\rightarrow$ A20 + IKKi                           | a20ina    | 10                            | $\mu$ M <sup>-1</sup> min <sup>-1</sup> | Kinase inactivation            | Cytoplasm | Fitted                |
| 103                                                          | IKKa $\rightarrow$ IKKi                                       | ki        | 1 $\times$ 10 <sup>-3</sup>   | min <sup>-1</sup>                       | Kinase inactivation            | Cytoplasm | Modified from (5)     |
| 104                                                          | IKKi $\rightarrow$ IKKne                                      | kp        | 2 $\times$ 10 <sup>-2</sup>   | min <sup>-1</sup>                       | Kinase inactivation            | Cytoplasm | (5)                   |
| <b>TAK1 activation and inactivation reactions</b>            |                                                               |           |                               |                                         |                                |           |                       |
| 105                                                          | TNF:TNFR + TAK1ne $\rightarrow$ TNF:TNFR + TAK1a              | tak1_nat  | 0                             | $\mu$ M <sup>-1</sup> min <sup>-1</sup> | Activation                     | Cytoplasm | Used                  |
| 106                                                          | TRAF6 + TAK1ne $\rightarrow$ TRAF6 + TAK1a                    | tak1_nat6 | 2                             | $\mu$ M <sup>-1</sup> min <sup>-1</sup> | Activation                     | Cytoplasm | Fitted                |
| 107                                                          | TAK1a $\rightarrow$ TAK1i                                     | tak1_ai   | 0.2                           | min <sup>-1</sup>                       | Kinase inactivation            | Cytoplasm | (1)                   |
| 108                                                          | TAK1i $\rightarrow$ TAK1ne                                    | tak1_in   | 5 $\times$ 10 <sup>-3</sup>   | min <sup>-1</sup>                       | Kinase inactivation            | Cytoplasm | Fitted                |
| <b>LPS/TLR4 receptor ligand dynamics</b>                     |                                                               |           |                               |                                         |                                |           |                       |
| 109                                                          | LPS + TLR4 $\rightarrow$ LPS:TLR4                             | rl_b_tl   | 3.2                           | $\mu$ M <sup>-1</sup> min <sup>-1</sup> | Association                    | Membrane  | (6)                   |
| 110                                                          | LPS:TLR4 $\rightarrow$ LPS + TLR4                             | rl_u_tl   | 5 $\times$ 10 <sup>-2</sup>   | min <sup>-1</sup>                       | Dissociation                   | Membrane  | (6)                   |
| 111                                                          | LPS:TLR4 $\rightarrow$ LPS:TLR4int                            | rl_i_tl   | 2 $\times$ 10 <sup>-3</sup>   | min <sup>-1</sup>                       | Import                         |           | Fitted                |
| 112                                                          | LPS:TLR4int $\rightarrow$ TLR4                                | rl_r_tl   | 1 $\times$ 10 <sup>-6</sup>   | min <sup>-1</sup>                       | Export                         |           | Fitted                |
| 113                                                          | LPS:TLR4int $\rightarrow$ LPS:TLR4d                           | rl_d_tl   | 2 $\times$ 10 <sup>-2</sup>   | min <sup>-1</sup>                       | Inactivation                   | Cytoplasm | Fitted                |
| <b>TNF/TNFR receptor ligand dynamics</b>                     |                                                               |           |                               |                                         |                                |           |                       |
| 114                                                          | TNFR + TNF:TNFR + TNFRi = tnfrtot                             | tnfrtot   | 0.1                           | $\mu$ M                                 | Concentration                  | Membrane  | Assumed               |
| 115                                                          | TNF:TNFR $\rightarrow$ TNF + TNFR                             | rl_u_tt   | 2 $\times$ 10 <sup>-2</sup>   | min <sup>-1</sup>                       | Dissociation                   | Membrane  | (1)                   |
| 116                                                          | TNF + TNFR $\rightarrow$ TNF:TNFR                             | rl_b_tt   | 1100                          | $\mu$ M <sup>-1</sup> min <sup>-1</sup> | Association                    | Membrane  | (1)                   |
| 117                                                          | LPS:TLR4 $\rightarrow$ LPS:TLR4int                            | rl_d_tt   | 1.2 $\times$ 10 <sup>-2</sup> | min <sup>-1</sup>                       | Degradation                    | Cytoplasm | (7)                   |
| 118                                                          | TNF:TNFRi $\rightarrow$ TNFR                                  | rl_r_tt   | 1 $\times$ 10 <sup>-2</sup>   | min <sup>-1</sup>                       | Export                         | Undefined | (2)                   |
| 119                                                          | TNF:TNFR $\rightarrow$ TNF:TNFRi                              | rl_i_tt   | 4.6 $\times$ 10 <sup>-2</sup> | min <sup>-1</sup>                       | Import                         | Undefined | (7)                   |
| 120                                                          | TNF:TNFR $\rightarrow$ TNF:TNFRi                              | rl_i_lt   | 1.45                          | min <sup>-1</sup>                       | Import (LPS induced)           | Undefined | Fitted to data in (8) |
| <b>IFN-<math>\beta</math>/IFNAR receptor ligand dynamics</b> |                                                               |           |                               |                                         |                                |           |                       |

|                                             |                                              |           |                      |                                    |                              |           |         |
|---------------------------------------------|----------------------------------------------|-----------|----------------------|------------------------------------|------------------------------|-----------|---------|
| 121                                         | IFNAR + IFN:IFNAR = ifnrtot <sup>**</sup>    | ifnrtot   | 0.1                  | μM                                 | Concentration                | Membrane  | Assumed |
| 122                                         | IFN + IFNAR → IFN:IFNAR                      | rl_b_iff  | 60                   | μM <sup>-1</sup> min <sup>-1</sup> | Association                  | Membrane  | (9)     |
| 123                                         | IFN:IFNAR → IFN + IFNAR                      | rl_u_iff  | 0.6                  | min <sup>-1</sup>                  | Dissociation                 | Membrane  | (9)     |
| <b>IL-10/IL10R receptor ligand dynamics</b> |                                              |           |                      |                                    |                              |           |         |
| 124                                         | IL-10R + IL10:IL10R = il10rtot <sup>**</sup> | il10rtot  | 0.1                  | μM                                 | Concentration                | Membrane  | Assumed |
| 125                                         | IL-10 + IL10R → IL10:IL10R                   | rl_b_ilil | 60                   | μM <sup>-1</sup> min <sup>-1</sup> | Association                  | Membrane  | (2)     |
| 126                                         | IL-10:IL10R → IL10 + IL10R                   | rl_u_ilil | 6×10 <sup>-3</sup>   | min <sup>-1</sup>                  | Dissociation                 | Membrane  | (2)     |
| <b>MyD88 reactions</b>                      |                                              |           |                      |                                    |                              |           |         |
| 127                                         | MyD88 + MyD88i = myd88tot <sup>**</sup>      | myd88tot  | 0.1                  | μM                                 | Concentration                | Cytoplasm | Assumed |
| 128                                         | LPS:TLR4 + MyD88i → LPS:TLR4 + MyD88         | pa_c_my   | 1                    | μM <sup>-1</sup> min <sup>-1</sup> | Activation                   | Cytoplasm | Fitted  |
| 129                                         | MyD88 → MyD88i                               | pd_c_my   | 0.12                 | min <sup>-1</sup>                  | Inactivation                 | Cytoplasm | Fitted  |
| <b>TRIF reactions</b>                       |                                              |           |                      |                                    |                              |           |         |
| 130                                         | TRIF + TRIFi = triftot <sup>**</sup>         | triftot   | 0.1                  | μM                                 | Concentration                | Cytoplasm | Assumed |
| 131                                         | LPS:TLR4int + TRIFi → LPS:TLR4int + TRIF     | pa_c_tr   | 2                    | μM <sup>-1</sup> min <sup>-1</sup> | Activation                   | Cytoplasm | Fitted  |
| 132                                         | TRIF → TRIFi                                 | pd_c_tr   | 0.185                | min <sup>-1</sup>                  | Inactivation                 | Cytoplasm | Fitted  |
| <b>TRAF6 reactions</b>                      |                                              |           |                      |                                    |                              |           |         |
| 133                                         | TRAF6 + TRAF6i = traf6tot <sup>**</sup>      | traf6tot  | 0.1                  | μM                                 | Concentration                | Cytoplasm | Assumed |
| 134                                         | MyD88 + TRAF6i → MyD88 + TRAF6               | a_c_am    | 1                    | μM <sup>-1</sup> min <sup>-1</sup> | Activation                   | Cytoplasm | Fitted  |
| 135                                         | TRIF + TRAF6i → TRIF + TRAF6                 | a_c_at    | 0.5                  | μM <sup>-1</sup> min <sup>-1</sup> | Activation                   | Cytoplasm | Fitted  |
| 136                                         | TRAF6 → TRAF6i                               | d_c_a     | 1.15                 | min <sup>-1</sup>                  | Inactivation                 | Cytoplasm | Fitted  |
| <b>TBK1 reactions</b>                       |                                              |           |                      |                                    |                              |           |         |
| 137                                         | TBK1 + TBK1i = tbktot <sup>**</sup>          | tbktot    | 0.1                  | μM                                 | Concentration                | Cytoplasm | Assumed |
| 138                                         | TRIF + TBK1i → TBK1                          | a_c_tt    | 10                   | μM <sup>-1</sup> min <sup>-1</sup> | Activation                   | Cytoplasm | Fitted  |
| 139                                         | TBK1 → TBK1i                                 | d_c_tt    | 5×10 <sup>-2</sup>   | min <sup>-1</sup>                  | Inactivation                 | Cytoplasm | Fitted  |
| <b>MKK reactions</b>                        |                                              |           |                      |                                    |                              |           |         |
| 140                                         | MKK + MKKi = mkktot <sup>**</sup>            | mkktot    | 0.1                  | μM                                 | Concentration                | Cytoplasm | Assumed |
| 141                                         | TAK1a + MKKi → TAK1a + MKK                   | a_c_tt    | 5                    | μM <sup>-1</sup> min <sup>-1</sup> | Activation                   | Cytoplasm | Fitted  |
| 142                                         | MKK → MKKi                                   | d_c_tt    | 3×10 <sup>-2</sup>   | min <sup>-1</sup>                  | Inactivation                 | Cytoplasm | Fitted  |
| <b>P38 reactions</b>                        |                                              |           |                      |                                    |                              |           |         |
| 143                                         | P38 + P38i = p38tot <sup>**</sup>            | p38tot    | 0.1                  | μM                                 | Concentration                | Cytoplasm | Assumed |
| 144                                         | MSK1 + P38i → MSK1 + P38                     | a_c_mp    | 10                   | μM <sup>-1</sup> min <sup>-1</sup> | Activation                   | Cytoplasm | Fitted  |
| 145                                         | P38 → P38i                                   | d_c_mp    | 8.5×10 <sup>-2</sup> | min <sup>-1</sup>                  | Inactivation                 | Cytoplasm | Fitted  |
| 146                                         | DUSP1 + P38 → DUSP1 + P38i                   | d_c_dp    | 50                   | μM <sup>-1</sup> min <sup>-1</sup> | Inactivation (Dusp1 induced) | Cytoplasm | Fitted  |
| <b>ERK reactions</b>                        |                                              |           |                      |                                    |                              |           |         |
| 147                                         | ERK + ERKi = erktot <sup>**</sup>            | erktot    | 0.1                  | μM                                 | Concentration                | Cytoplasm | Assumed |
| 148                                         | MKK + ERKi → MKK + ERK                       | a_c_me    | 1.3                  | μM <sup>-1</sup> min <sup>-1</sup> | Activation                   | Cytoplasm | Fitted  |
| 149                                         | ERK → ERKi                                   | d_c_me    | 7×10 <sup>-2</sup>   | min <sup>-1</sup>                  | Inactivation                 | Cytoplasm | Fitted  |
| <b>MSK1 reactions</b>                       |                                              |           |                      |                                    |                              |           |         |
| 150                                         | MSK1 + MSK1i = msk1tot <sup>**</sup>         | msk1tot   | 0.1                  | μM                                 | Concentration                | Cytoplasm | Assumed |
| 151                                         | P38 + MSK1i → P38 + MSK1                     | a_c_pm    | 95                   | μM <sup>-1</sup> min <sup>-1</sup> | Activation                   | Cytoplasm | Fitted  |
| 152                                         | MSK1 → MSK1i                                 | d_c_pm    | 10                   | min <sup>-1</sup>                  | Inactivation                 | Cytoplasm | Fitted  |
| <b>MSK2 reactions</b>                       |                                              |           |                      |                                    |                              |           |         |
| 153                                         | MSK2 + MSK2i = msk2tot <sup>**</sup>         | msk2tot   | 0.1                  | μM                                 | Concentration                | Cytoplasm | Assumed |
| 154                                         | ERK + MSK2i → ERK + MSK2                     | a_c_pm    | 40                   | μM <sup>-1</sup> min <sup>-1</sup> | Activation                   | Cytoplasm | Fitted  |
| 155                                         | MSK2 → MSK2i                                 | d_c_pm    | 0.84                 | min <sup>-1</sup>                  | Inactivation                 | Cytoplasm | Fitted  |
| <b>JAK1 reactions</b>                       |                                              |           |                      |                                    |                              |           |         |
| 156                                         | JAK1 + JAK1i = jak1tot <sup>**</sup>         | jak1tot   | 1E-1                 | μM                                 | Concentration                | Cytoplasm | Assumed |

|                                 |                                        |          |                    |                                    |                                                                                |               |         |
|---------------------------------|----------------------------------------|----------|--------------------|------------------------------------|--------------------------------------------------------------------------------|---------------|---------|
| 157                             | IFN:IFNAR + JAK1i → JAK1               | a_c_ij   | 100                | $\mu\text{M}^{-1} \text{min}^{-1}$ | Activation                                                                     | Cytoplasm     | Fitted  |
| 158                             | JAK1 → JAK1i                           | d_c_ij   | 0.1                | $\text{min}^{-1}$                  | Inactivation                                                                   | Cytoplasm     | Fitted  |
| <b>PI3K reactions</b>           |                                        |          |                    |                                    |                                                                                |               |         |
| 159                             | PI3K + PI3Ki = pi3ktot**               | pi3ktot  | 0.1                | $\mu\text{M}$                      | Concentration                                                                  | Cytoplasm     | Assumed |
| 160                             | JAK1 + PI3Ki → JAK1 + PI3K             | a_c_jp   | 20                 | $\mu\text{M}^{-1} \text{min}^{-1}$ | Activation                                                                     | Cytoplasm     | Fitted  |
| 161                             | PI3K → PI3Ki                           | d_c_jp   | 2                  | $\text{min}^{-1}$                  | Inactivation                                                                   | Cytoplasm     | Fitted  |
| <b>GSK3 reactions</b>           |                                        |          |                    |                                    |                                                                                |               |         |
| 162                             | GSK3 + GSK3i = gsk3ktot**              | gsk3tot  | 0.1                | $\mu\text{M}$                      | Concentration                                                                  | Cytoplasm     | Assumed |
| 163                             | PI3K + GSK3 → PI3K + GSK3i             | a_c_pg   | 1                  | $\mu\text{M}^{-1} \text{min}^{-1}$ | Inactivation                                                                   | Cytoplasm     | Fitted  |
| 164                             | GSK3i → GSK3                           | d_c_pg   | 1                  | $\text{min}^{-1}$                  | Activation                                                                     | Cytoplasm     | Fitted  |
| <b>JAK1il reactions</b>         |                                        |          |                    |                                    |                                                                                |               |         |
| 165                             | JAK1il + JAK1ili = jak3tot**           | jak3tot  | 0.1                | $\mu\text{M}$                      | Concentration                                                                  | Cytoplasm     | Assumed |
| 166                             | IL10:IL10R + JAK1ili → JAK1il          | a_c_ilj  | 20                 | $\mu\text{M}^{-1} \text{min}^{-1}$ | Activation                                                                     | Cytoplasm     | Fitted  |
| 167                             | JAK1il → JAK1ili                       | d_c_ilj  | 1                  | $\text{min}^{-1}$                  | Inactivation                                                                   | Cytoplasm     | Fitted  |
| <b>IRF3 reactions</b>           |                                        |          |                    |                                    |                                                                                |               |         |
| 168                             | IRF3i + pIRF3 + pIRF3n = irf3tot**     | irf3tot  | 0.1                | $\mu\text{M}$                      | Concentration                                                                  | Cytoplasm     | Assumed |
| 169                             | TBK1 + IRF3i → TBK1 + pIRF3            | a_c_ti   | 2                  | $\mu\text{M}^{-1} \text{min}^{-1}$ | Activation                                                                     | Cytoplasm     | Fitted  |
| 170                             | pIRF3 → IRF3i                          | d_c_i    | 0.1                | $\text{min}^{-1}$                  | Inactivation                                                                   | Cytoplasm     | Fitted  |
| 171                             | pIRF3 → pIRF3n                         | in_i     | 1                  | $\text{min}^{-1}$                  | Import                                                                         | Undefined     | Fitted  |
| 172                             | pIRF3n → pIRF3                         | ex_i     | 0.1                | $\text{min}^{-1}$                  | Export                                                                         | Undefined     | Fitted  |
| <b>CREB reactions</b>           |                                        |          |                    |                                    |                                                                                |               |         |
| 173                             | CREBi + pCREB + pCREBn = crebtot**     | crebtot  | 0.1                | $\mu\text{M}$                      | Concentration                                                                  | Cytoplasm     | Assumed |
| 174                             | MSK1 + CREBi → MSK1 + pCREB            | a_c_m1c  | 1                  | $\mu\text{M}^{-1} \text{min}^{-1}$ | Activation                                                                     | Cytoplasm     | Fitted  |
| 175                             | MSK2 + CREBi → MSK2 + pCREB            | a_c_m2c  | 0                  | $\mu\text{M}^{-1} \text{min}^{-1}$ | Activation                                                                     | Cytoplasm     | Assumed |
| 176                             | GSK3 + pCREB → GSK3 + CREBi            | d_c_gc   | 3                  | $\mu\text{M}^{-1} \text{min}^{-1}$ | Inactivation                                                                   | Cytoplasm     | Fitted  |
| 177                             | pCREB → pCREBn                         | in_c     | 1                  | $\text{min}^{-1}$                  | Import                                                                         | Undefined     | Fitted  |
| 178                             | pCREBn → pCREB                         | ex_c     | 0.2                | $\text{min}^{-1}$                  | Export                                                                         | Undefined     | Fitted  |
| 179                             | pCREB → CREBi                          | d_c_c    | $2 \times 10^{-2}$ | $\text{min}^{-1}$                  | Inactivation                                                                   | Cytoplasm     | Assumed |
| <b>STAT3 reactions</b>          |                                        |          |                    |                                    |                                                                                |               |         |
| 180                             | STAT3i + pSTAT3 + pSTAT3n = stat3tot** | stat3tot | 0.1                | $\mu\text{M}$                      | Concentration                                                                  | Cytoplasm     | Assumed |
| 181                             | JAK1il + STAT3i → JAK3 + pSTAT3        | a_c_js   | 20                 | $\mu\text{M}^{-1} \text{min}^{-1}$ | Activation                                                                     | Cytoplasm     | Fitted  |
| 182                             | pSTAT3 → STAT3i                        | d_c_js   | 2                  | $\text{min}^{-1}$                  | Inactivation                                                                   | Cytoplasm     | Fitted  |
| 183                             | pSTAT3 → pSTAT3n                       | in_s     | 1                  | $\text{min}^{-1}$                  | Import                                                                         | Undefined     | Fitted  |
| 184                             | pSTAT3n → pSTAT3                       | ex_s     | 1                  | $\text{min}^{-1}$                  | Export                                                                         | Undefined     | Fitted  |
| <b>ATF reactions</b>            |                                        |          |                    |                                    |                                                                                |               |         |
| 185                             | ATF1i + pATF1 + pATF1n = atftot**      | atftot   | 0.1                | $\mu\text{M}$                      | Concentration                                                                  | Cytoplasm     | Assumed |
| 186                             | MSK1 + ATFi → MSK1 + pATF              | a_c_m1a  | 82                 | $\mu\text{M}^{-1} \text{min}^{-1}$ | Activation                                                                     | Cytoplasm     | Fitted  |
| 187                             | MSK2 + ATFi → MSK2 + pATF              | a_c_m2a  | 45                 | $\mu\text{M}^{-1} \text{min}^{-1}$ | Activation                                                                     | Cytoplasm     | Fitted  |
| 188                             | pATF1 → ATF1i                          | d_c_ab   | $1 \times 10^{-2}$ | $\text{min}^{-1}$                  | Inactivation                                                                   | Cytoplasm     | Fitted  |
| 189                             | pATF1 → pATF1n                         | in_a     | 0.84               | $\text{min}^{-1}$                  | Import                                                                         | Undefined     | Fitted  |
| 190                             | pATF1n → pATF1                         | ex_a     | 0.79               | $\text{min}^{-1}$                  | Export                                                                         | Undefined     | Fitted  |
| <b>Miscellaneous parameters</b> |                                        |          |                    |                                    |                                                                                |               |         |
| 191                             |                                        | LPS      | 0.5                | nM                                 | Concentration                                                                  | Extracellular | Used    |
| 192                             |                                        | kmuM     | $3 \times 10^{-4}$ | Dimensionless                      | Conversion factor used to convert intracellular concentration to extracellular | Undefined     | Derived |

|                                                                                                        |                                                                                                                                                               | assuming 100K/mL<br>cells with a 10 $\mu$ m<br>radius |
|--------------------------------------------------------------------------------------------------------|---------------------------------------------------------------------------------------------------------------------------------------------------------------|-------------------------------------------------------|
| <b>Functions</b>                                                                                       |                                                                                                                                                               |                                                       |
| NF- $\kappa$ B induced gene transcription of I $\kappa$ B $\alpha$ , I $\kappa$ B $\epsilon$ , and A20 | $f(\text{NF}\kappa\text{Bn}) = \text{mmVmax}^* \text{NF}\kappa\text{Bn}^{\text{mmHc}} / (\text{mmKm}^{\text{mmHc}} + \text{NF}\kappa\text{Bn}^{\text{mmHc}})$ |                                                       |
| REP induced inhibition of TNF transcription                                                            | $g(\text{REP}) = a_{\text{rep}} - \text{REP}/k_{\text{rep}}$ if $\text{REP} \leq b_{\text{rep}}$ , 0 if $\text{REP} > b_{\text{rep}}$                         |                                                       |
| NF- $\kappa$ B induced gene transcription of TNF                                                       | $h(\text{NF}\kappa\text{Bn}, \text{REP}) = f(\text{NF}\kappa\text{Bn}) \times g(\text{REP})$                                                                  |                                                       |
| MyD88 induced activation of TRAF6                                                                      | $f(\text{MyD88}) = \text{mmVmax}^* \text{MyD88}^{\text{mmHc}} / (\text{mmKm}^{\text{mmHc}} + \text{MyD88}^{\text{mmHc}})$                                     |                                                       |
| TRIF induced activation of TRAF6                                                                       | $f(\text{TRIF}) = \text{mmVmax}^* \text{TRIF}^{\text{mmHc}} / (\text{mmKm}^{\text{mmHc}} + \text{TRIF}^{\text{mmHc}})$                                        |                                                       |
| CREB induced gene transcription of IL-10                                                               | $f(\text{pCREBn}) = \text{mmVmax}^* \text{pCREBn}^{\text{mmHc}} / (\text{mmKm}^{\text{mmHc}} + \text{pCREBn}^{\text{mmHc}})$                                  |                                                       |
| ATF induced gene transcription of DUSP1                                                                | $f(\text{pATFn}) = \text{mmVmax}^* \text{pATFn}^{\text{mmHc}} / (\text{mmKm}^{\text{mmHc}} + \text{pATFn}^{\text{mmHc}})$                                     |                                                       |
| IRF3 induced gene transcription of IFN- $\beta$                                                        | $f(\text{pIRF3n}) = \text{mmVmax}^* \text{pIRF3n}^{\text{mmHc}} / (\text{mmKm}^{\text{mmHc}} + \text{pIRF3n}^{\text{mmHc}})$                                  |                                                       |
| LPS induced internalization of TNFR                                                                    | $f(\text{LPS}) = \text{mmVmax}^* \text{LPS}^{\text{mmHc}} / (\text{mmKm}^{\text{mmHc}} + \text{LPS}^{\text{mmHc}})$                                           |                                                       |

**Table S1 Legend.** The model species appearing in Table S1 are named as follows: X = species located in the cytoplasm; pX = phosphorylated form of the species located in the cytoplasm; Xn = species located in the nucleus; pXn = phosphorylated form of the species located in the nucleus; Xe = species located extracellularly; Xi = inactive form of the species; Xint = extracellular species internalized; Xt = spliced transcript of a species; pre-Xt = unspliced transcript of a species; Xa = active form of a species; Xne = neutral form of a species; X:Y = species X bound to species Y

\* In these reactions the species that appears second never changes.

\*\* In these reactions the species on the right-hand-side of the equal sign denotes a conserved quantity.



**Table S2.** Model parameter numbers and names as they appear in the MATLAB code and in Figs. S5-S8.

| Parameter # | Parameter name   |
|-------------|------------------|
| 1           | in_a             |
| 2           | in_e             |
| 3           | ex_a             |
| 4           | ex_e             |
| 5           | in_2an           |
| 6           | in_2en           |
| 7           | ex_2an           |
| 8           | ex_2en           |
| 9           | in_n             |
| 10          | ex_n             |
| 11          | pd_n_a           |
| 12          | pd_n_e           |
| 13          | pd_n_2an         |
| 14          | pd_n_2en         |
| 15          | pd_c_2an         |
| 16          | pd_c_2en         |
| 17          | a_c_an           |
| 18          | a_c_en           |
| 19          | a_n_an           |
| 20          | a_n_en           |
| 21          | d_c_an           |
| 22          | d_c_en           |
| 23          | d_n_an           |
| 24          | d_n_en           |
| 25          | pd_c_2ai         |
| 26          | pd_c_2ei         |
| 27          | pd_c_3ain        |
| 28          | pd_c_3ain        |
| 29          | cnvr             |
| 30          | mmVmax           |
| 31          | mmKm             |
| 32          | mmHc             |
| 33          | a <sub>rep</sub> |
| 34          | b <sub>rep</sub> |
| 35          | k <sub>rep</sub> |
| 36          | prs_an           |
| 37          | prd_a            |
| 38          | a_n_spa          |
| 39          | prs_a            |

|    |           |
|----|-----------|
| 40 | rs_a      |
| 41 | rd_a      |
| 42 | ps_c_a    |
| 43 | pd_c_a    |
| 44 | prs_en    |
| 45 | prd_e     |
| 46 | a_n_spe   |
| 47 | prs_e     |
| 48 | rs_e      |
| 49 | rd_e      |
| 50 | ps_c_e    |
| 51 | pd_c_e    |
| 52 | prs_a20n  |
| 53 | prd_a20   |
| 54 | a_n_spa20 |
| 55 | prs_a20   |
| 56 | rs_a20    |
| 57 | rd_a20    |
| 58 | ps_c_a20  |
| 59 | pd_c_a20  |
| 60 | prs_t     |
| 61 | prd_t     |
| 62 | a_n_spt   |
| 63 | rs_t      |
| 64 | rd_t      |
| 65 | ps_c_t    |
| 66 | pd_c_t    |
| 67 | ex_tnf    |
| 68 | pd_e_t    |
| 69 | prs_i     |
| 70 | prd_ifn   |
| 71 | a_n_spifn |
| 72 | rs_ifn    |
| 73 | rd_ifn    |
| 74 | ps_c_ifn  |
| 75 | pd_c_ifn  |
| 76 | ex_ifn    |
| 77 | pd_e_ifn  |
| 78 | prs_il    |
| 79 | prd_il    |
| 80 | a_n_spil  |
| 81 | rs_il     |
| 82 | rd_il     |
| 83 | ps_c_il   |
| 84 | pd_c_il   |

|     |           |
|-----|-----------|
| 85  | ex_il     |
| 86  | pd_e_il   |
| 87  | prs_du    |
| 88  | prd_du    |
| 89  | a_n_spdu  |
| 90  | rs_du     |
| 91  | rd_du     |
| 92  | ps_c_du   |
| 93  | pd_c_du   |
| 94  | prs_re    |
| 95  | prd_re    |
| 96  | a_n_spre  |
| 97  | rs_re     |
| 98  | rd_re     |
| 99  | ps_c_re   |
| 100 | pd_c_re   |
| 101 | ka        |
| 102 | a20ina    |
| 103 | ki        |
| 104 | kp        |
| 105 | tak1_nat  |
| 106 | tak1_nat6 |
| 107 | tak1_ai   |
| 108 | tak1_in   |
| 109 | rl_b_tl   |
| 110 | rl_u_tl   |
| 111 | rl_i_tl   |
| 112 | rl_r_tl   |
| 113 | rl_d_tl   |
| 114 | tnfrtot   |
| 115 | rl_u_tt   |
| 116 | rl_b_tt   |
| 117 | rl_d_tt   |
| 118 | rl_r_tt   |
| 119 | rl_i_tt   |
| 120 | rl_i_lt   |
| 121 | ifnrtot   |
| 122 | rl_b_ifif |
| 123 | rl_u_ifif |
| 124 | il10rtot  |
| 125 | rl_b_ilil |
| 126 | rl_u_ilil |
| 127 | myd88tot  |
| 128 | pa_c_my   |
| 129 | pd_c_my   |

|     |          |
|-----|----------|
| 130 | triftot  |
| 131 | pa_c_tr  |
| 132 | pd_c_tr  |
| 133 | traf6tot |
| 134 | a_c_am   |
| 135 | a_c_at   |
| 136 | d_c_a    |
| 137 | tbktot   |
| 138 | a_c_tt   |
| 139 | d_c_tt   |
| 140 | mkktot   |
| 141 | a_c_tt   |
| 142 | d_c_tt   |
| 143 | p38tot   |
| 144 | a_c_mp   |
| 145 | d_c_mp   |
| 146 | d_c_dp   |
| 147 | erktot   |
| 148 | a_c_me   |
| 149 | d_c_me   |
| 150 | msk1tot  |
| 151 | a_c_pm   |
| 152 | d_c_pm   |
| 153 | msk2tot  |
| 154 | a_c_pm   |
| 155 | d_c_pm   |
| 156 | jak1tot  |
| 157 | a_c_ij   |
| 158 | d_c_ij   |
| 159 | pi3ktot  |
| 160 | a_c_jp   |
| 161 | d_c_jp   |
| 162 | gsk3tot  |
| 163 | a_c_pg   |
| 164 | d_c_pg   |
| 165 | jak3tot  |
| 166 | a_c_ilj  |
| 167 | d_c_ilj  |
| 168 | irf3tot  |
| 169 | a_c_ti   |
| 170 | d_c_i    |
| 171 | in_i     |
| 172 | ex_i     |
| 173 | crebtot  |
| 174 | a_c_mlc  |

|     |           |
|-----|-----------|
| 175 | a_c_m2c   |
| 176 | d_c_gc    |
| 177 | in_c      |
| 178 | ex_c      |
| 179 | d_c_c     |
| 180 | stat3tot  |
| 181 | a_c_js    |
| 182 | d_c_js    |
| 183 | in_s      |
| 184 | ex_s      |
| 185 | atftot    |
| 186 | a_c_m1a   |
| 187 | a_c_m2a   |
| 188 | d_c_ab    |
| 189 | in_a      |
| 190 | ex_a      |
| 191 | LPS       |
| 192 | k $\mu$ M |

**Table S3.** Model species numbers and names as they appear in the MATLAB code and in Figs. S5-S8.

| Species # | Species name                                            |
|-----------|---------------------------------------------------------|
| 1         | I $\kappa$ B $\alpha$                                   |
| 2         | I $\kappa$ B $\alpha$ n (nuclear)                       |
| 3         | I $\kappa$ B $\alpha$ :NF- $\kappa$ B                   |
| 4         | I $\kappa$ B $\alpha$ :NF- $\kappa$ Bn (nuclear)        |
| 5         | I $\kappa$ B $\alpha$ t (mRNA)                          |
| 6         | I $\kappa$ B $\epsilon$                                 |
| 7         | I $\kappa$ B $\epsilon$ n (nuclear)                     |
| 8         | I $\kappa$ B $\epsilon$ :NF- $\kappa$ B                 |
| 9         | I $\kappa$ B $\epsilon$ :NF- $\kappa$ Bn (nuclear)      |
| 10        | I $\kappa$ B $\epsilon$ t (mRNA)                        |
| 11        | A20                                                     |
| 12        | A20t (mRNA)                                             |
| 13        | NF- $\kappa$ B                                          |
| 14        | NF- $\kappa$ Bn (nuclear)                               |
| 15        | IKKa (active)                                           |
| 16        | IKKne (neutral)                                         |
| 17        | IKKi (inactive)                                         |
| 18        | TAK1a (active)                                          |
| 19        | TAK1ne (neutral)                                        |
| 20        | TAK1i (inactive)                                        |
| 21        | prna_a (I $\kappa$ B $\alpha$ unspliced mRNA)           |
| 22        | srna_a (I $\kappa$ B $\alpha$ spliceosome bound mRNA)   |
| 23        | prna_e (I $\kappa$ B $\epsilon$ unspliced mRNA)         |
| 24        | srna_e (I $\kappa$ B $\epsilon$ spliceosome bound mRNA) |
| 25        | prna_a20 (A20 unspliced mRNA)                           |
| 26        | srna_20 (A20 spliceosome bound mRNA)                    |
| 27        | prna_t (TNF unspliced mRNA)                             |
| 28        | srna_t (TNF spliceosome bound mRNA)                     |
| 29        | TNFt (mRNA)                                             |
| 30        | TNF <sub>i</sub> (cytosolic)                            |
| 31        | TNF <sub>e</sub> (extracellular)                        |
| 32        | prna_i (IFN- $\beta$ unspliced mRNA)                    |
| 33        | srna_i (IFN- $\beta$ spliceosome bound mRNA)            |
| 34        | IFN- $\beta$ t (mRNA)                                   |
| 35        | IFN- $\beta$ <sub>i</sub> (cytosolic)                   |
| 36        | IFN- $\beta$ <sub>e</sub> (extracellular)               |
| 37        | prna_il (IL10 unspliced mRNA)                           |
| 38        | srna_il (IL10 spliceosome bound mRNA)                   |
| 39        | IL10t (mRNA)                                            |
| 40        | IL10 <sub>i</sub> (cytosolic)                           |

|    |                                       |
|----|---------------------------------------|
| 41 | IL10e (extracellular)                 |
| 42 | prna_du (DUSP unspliced mRNA)         |
| 43 | srna_du (DUSP spliceosome bound mRNA) |
| 44 | DUSPt (mRNA)                          |
| 45 | DUSP (cytosolic)                      |
| 46 | prna_re (REP unspliced mRNA)          |
| 47 | srna_re (REP spliceosome bound mRNA)  |
| 48 | REPt (mRNA)                           |
| 49 | REP (cytosolic)                       |
| 50 | TLR4                                  |
| 51 | LPS:TLR4                              |
| 52 | LPS:TLR4i (internalized)              |
| 53 | LPS:TLR4d (decayed and recycled)      |
| 54 | TNFR                                  |
| 55 | TNF:TNFR                              |
| 56 | IFNR                                  |
| 57 | IL10R                                 |
| 58 | MyD88                                 |
| 59 | TRIF                                  |
| 60 | TRAF6                                 |
| 61 | TBK1                                  |
| 62 | MKK                                   |
| 63 | P38a                                  |
| 64 | ERKa (active)                         |
| 65 | MSK1                                  |
| 66 | MSK2                                  |
| 67 | JAK1 (IFN- $\beta$ bound)             |
| 68 | PI3K                                  |
| 69 | GSK3                                  |
| 70 | JAK1il (IL10 bound)                   |
| 71 | pIRF3 (phosphorylated)                |
| 72 | pIRF3n (nuclear)                      |
| 73 | pCREB (phosphorylated)                |
| 74 | pCREBn (nuclear)                      |
| 75 | pSTAT3 (phosphorylated)               |
| 76 | pSTAT3n (nuclear)                     |
| 77 | pATF (phosphorylated)                 |
| 78 | pATFn (nuclear)                       |

## 2. Supplementary Figures

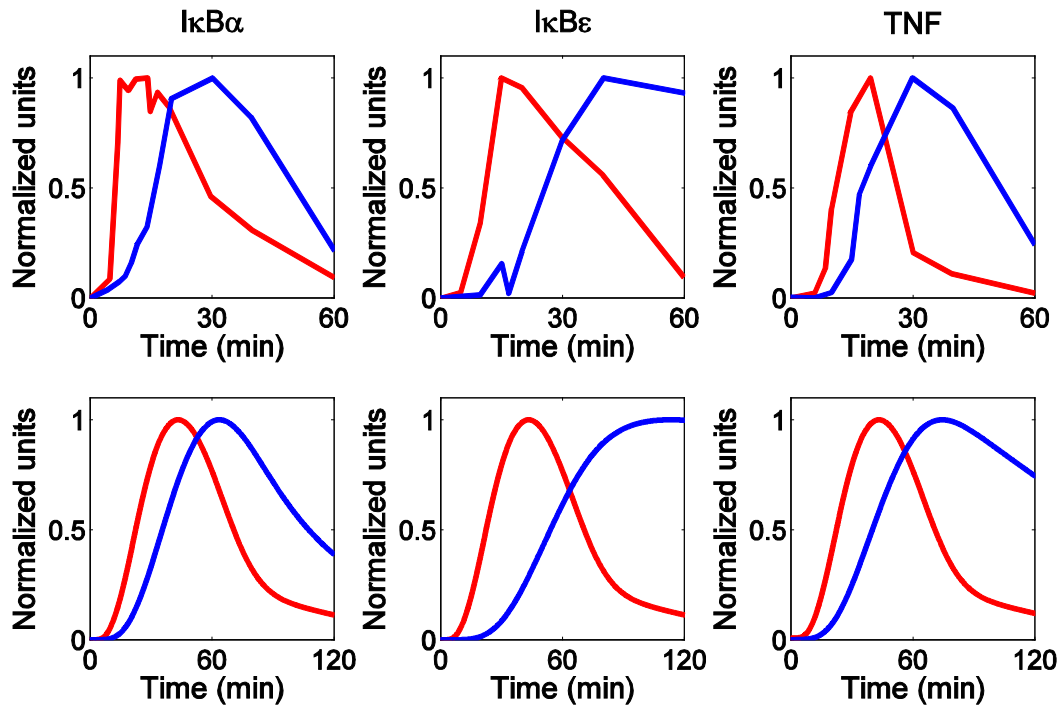

**Figure S1.** Experimental data used for calibration, and model simulations, of premature and mature mRNA kinetics. Upper panels: unspliced pre-mRNA (red) and spliced mRNA (blue) transcripts for  $\text{IkB}\alpha$ ,  $\text{IkB}\epsilon$ , and TNF measured from bone marrow-derived macrophages challenged with TNF (10 ng/ml) for 1 h (10). Lower panels: simulated trajectories of pre-mRNA (red) and mRNA (blue) of  $\text{IkB}\alpha$ ,  $\text{IkB}\epsilon$ , and TNF after an LPS challenge. The horizontal axes between the upper and lower panel figures differ because the experimental data were obtained after a TNF challenge, whereas simulated data were generated for an LPS challenge. The response to TNF occurs with faster kinetics compared to a response to LPS. Therefore, we expected the simulated species to display slower kinetics under LPS stimulation. In our calibration, we chose to maintain the *relative* timing between the unspliced and spliced transcripts rather than the *absolute* timing.



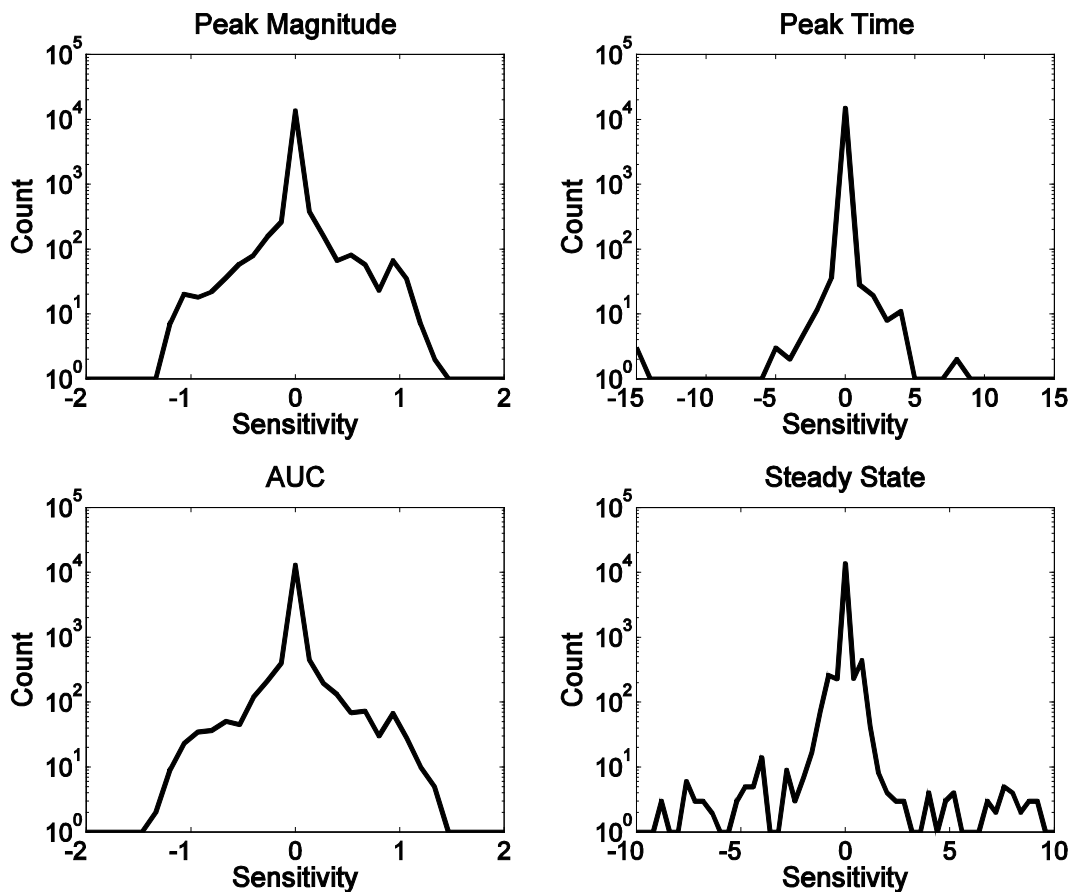

**Figure S2.** Histograms of sensitivities. We perturbed the value of each parameter in the model by  $\pm 1\%$  and evaluated the sensitivity of the trajectory of every model species according to Eq. 5 in the Materials and Methods Section of the main text. Thus, for each feature, we obtained  $192$  (parameters)  $\times$   $78$  (model variables) =  $14,976$  sensitivity values, which are plotted in the histograms. The horizontal axis of each subpanel shows sensitivity intervals (indicated by the horizontal axis limits in each subplot) that were divided into 30 evenly spaced bins, while the vertical axis shows the number of sensitivities that fall into each bin. AUC refers to the area under the curve of a biochemical species trajectory. (Note that, for all subplots, the  $x$ -axis scale is linear, while the  $y$ -axis scale is logarithmic.)

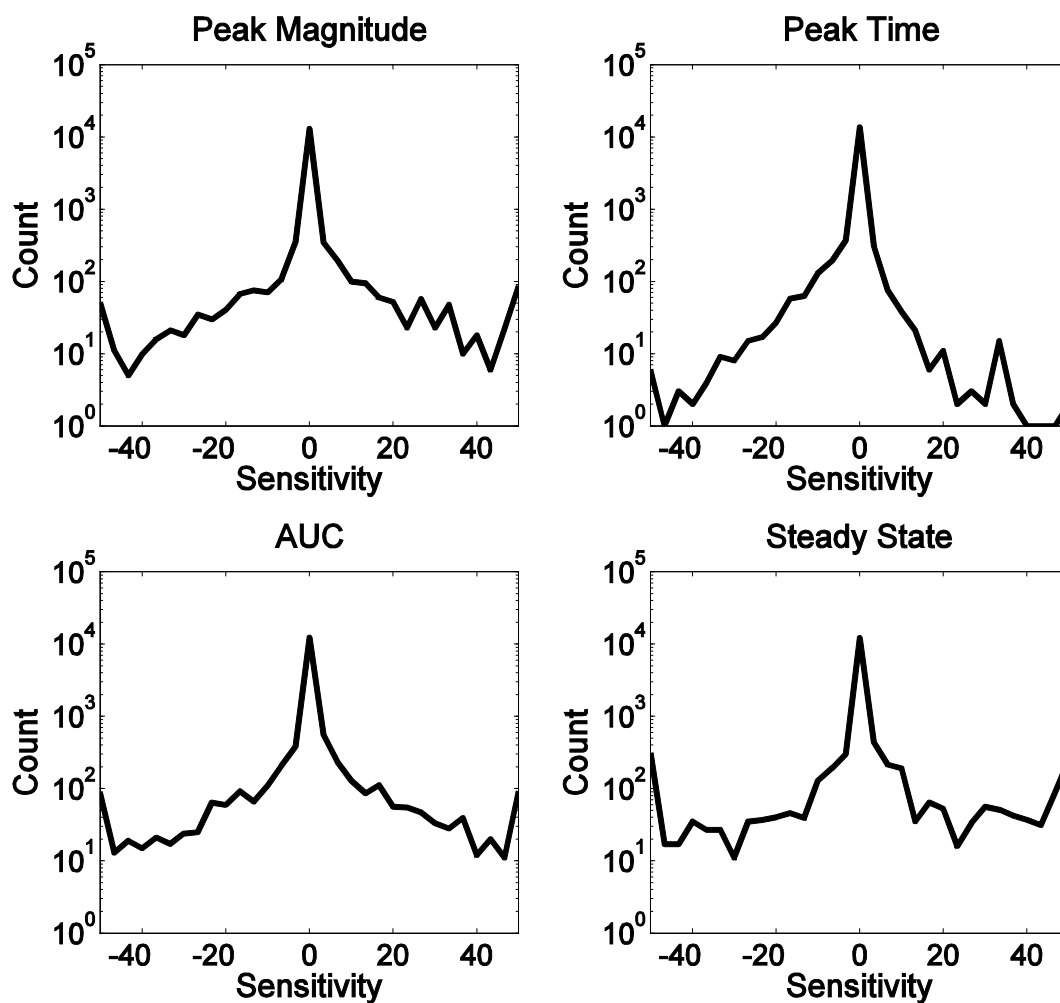

**Figure S3.** Histograms of sensitivities. We perturbed the value of each parameter in the model by  $\pm 50\%$  and evaluated the sensitivity of the trajectory of every model species (see the Materials and Methods Section in the main text). Thus, for each feature, we obtained  $192$  (parameters)  $\times$   $78$  (model variables) =  $14,976$  sensitivity values, which are plotted in the histograms. For each subplot, the horizontal axis reflects sensitivity intervals  $(-50, 50)$  that were divided into 30 evenly spaced bins, while the vertical axis shows the number of sensitivities that fall into each bin. AUC refers to the area under the curve of a biochemical species trajectory. (Note that, for all subplots, the x-axis scale is linear, while the y-axis scale is logarithmic.)

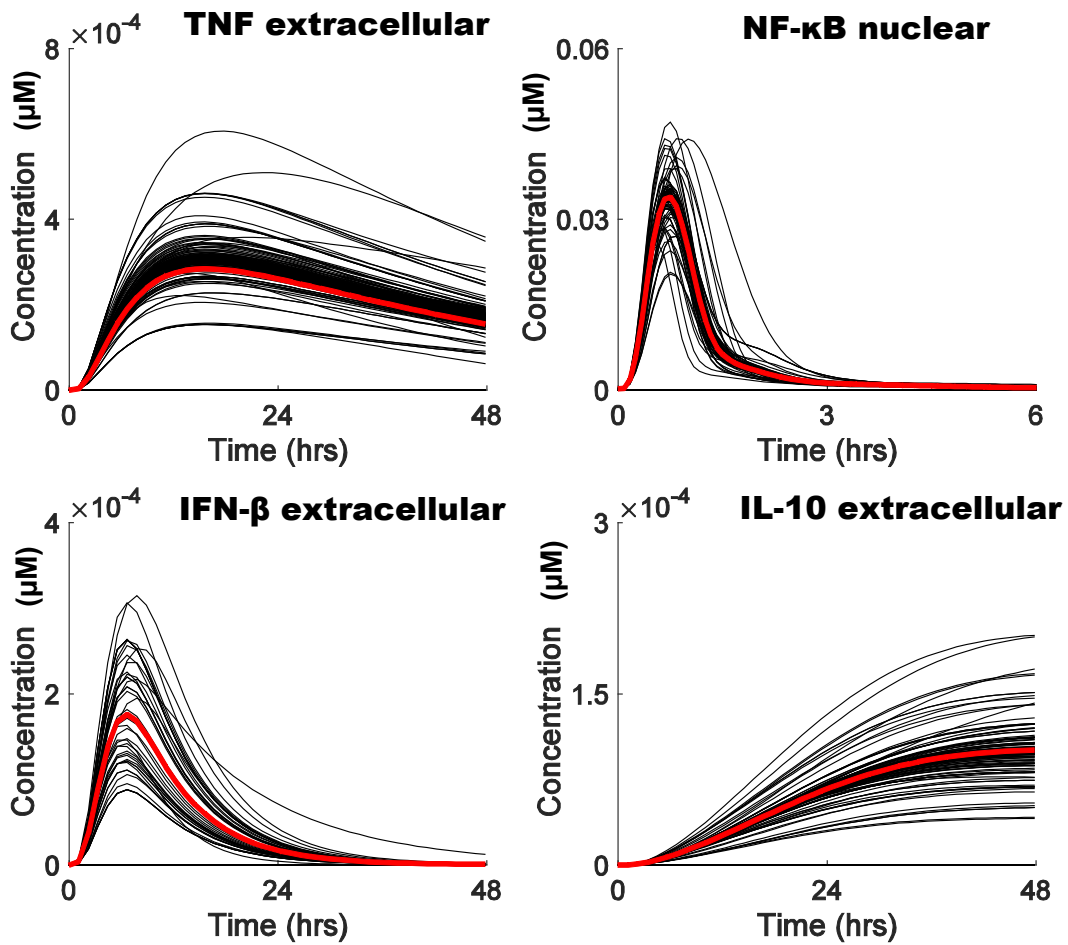

**Figure S4.** Species trajectories resulting from model simulations using the default parameter set (red trace) or after perturbing the value of each parameter in the model by +50% or -50% (black lines; thus, for each model parameter and each species, we have two black lines: one for the increased parameter and one for the decreased parameter).

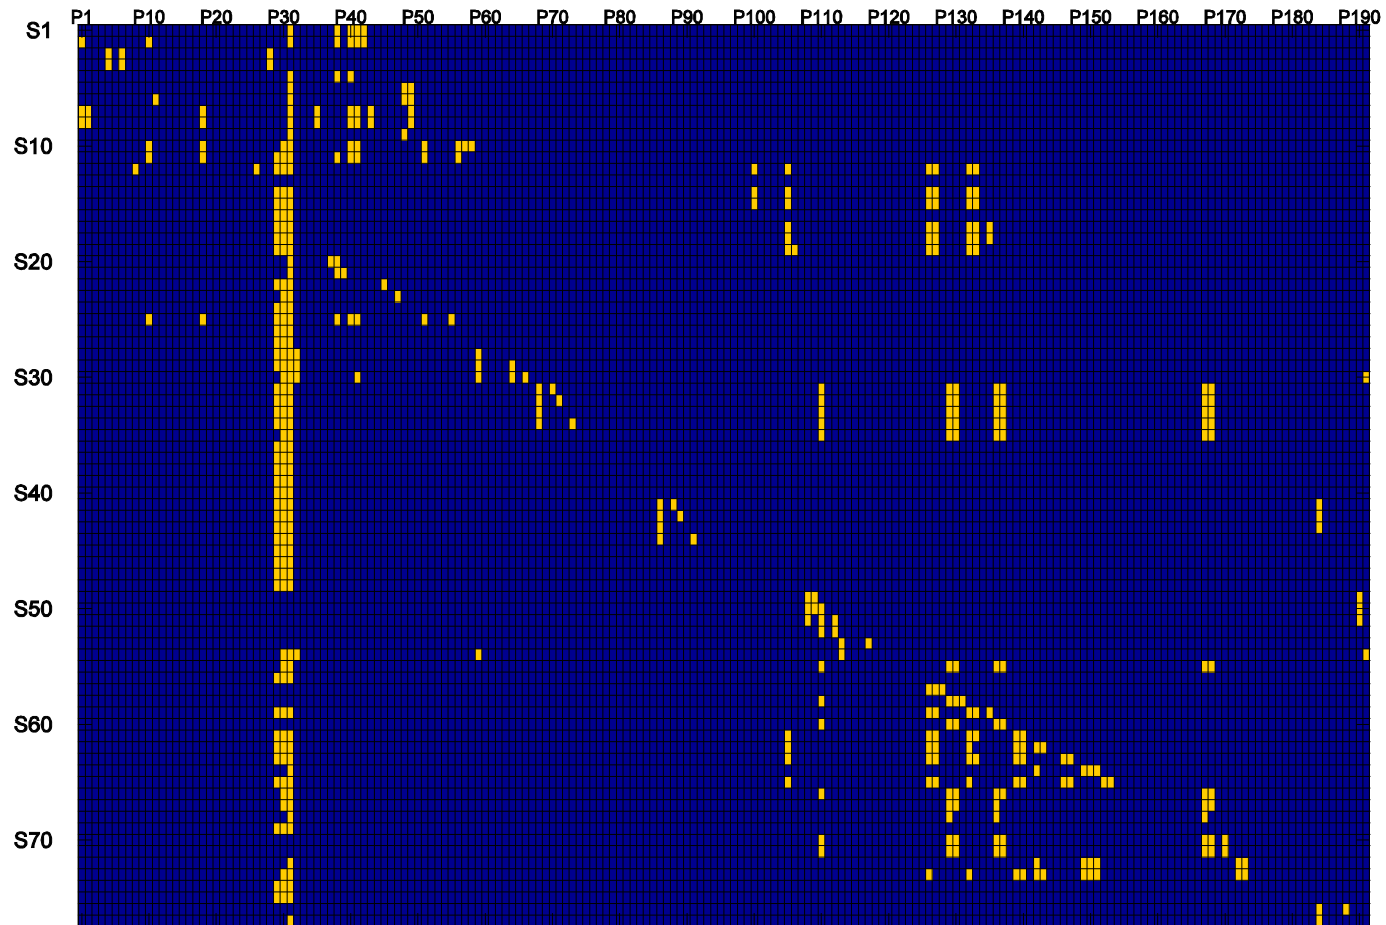

**Figure S5.** Global sensitivity analysis at 1 h. The  $x$ -axis shows parameter ordinal numbers (Table S2), whereas the  $y$ -axis shows model species (Table S3). We ran 50,000 simulations. For each simulation, we generated a random set of parameters using the Latin hypercube sampling scheme, where the value of each parameter in the model was drawn from a uniform distribution with 50% (200%) of the default parameter value as lower (upper) limit. We evaluated the Partial Rank Correlation Coefficient (PRCC) for each variable with respect to each parameter (11). Here, the PRCCs whose value is  $>0.5$  are shown in yellow. The three columns centered on parameter #30 (P30) refer to the parameters controlling gene transcription rates.

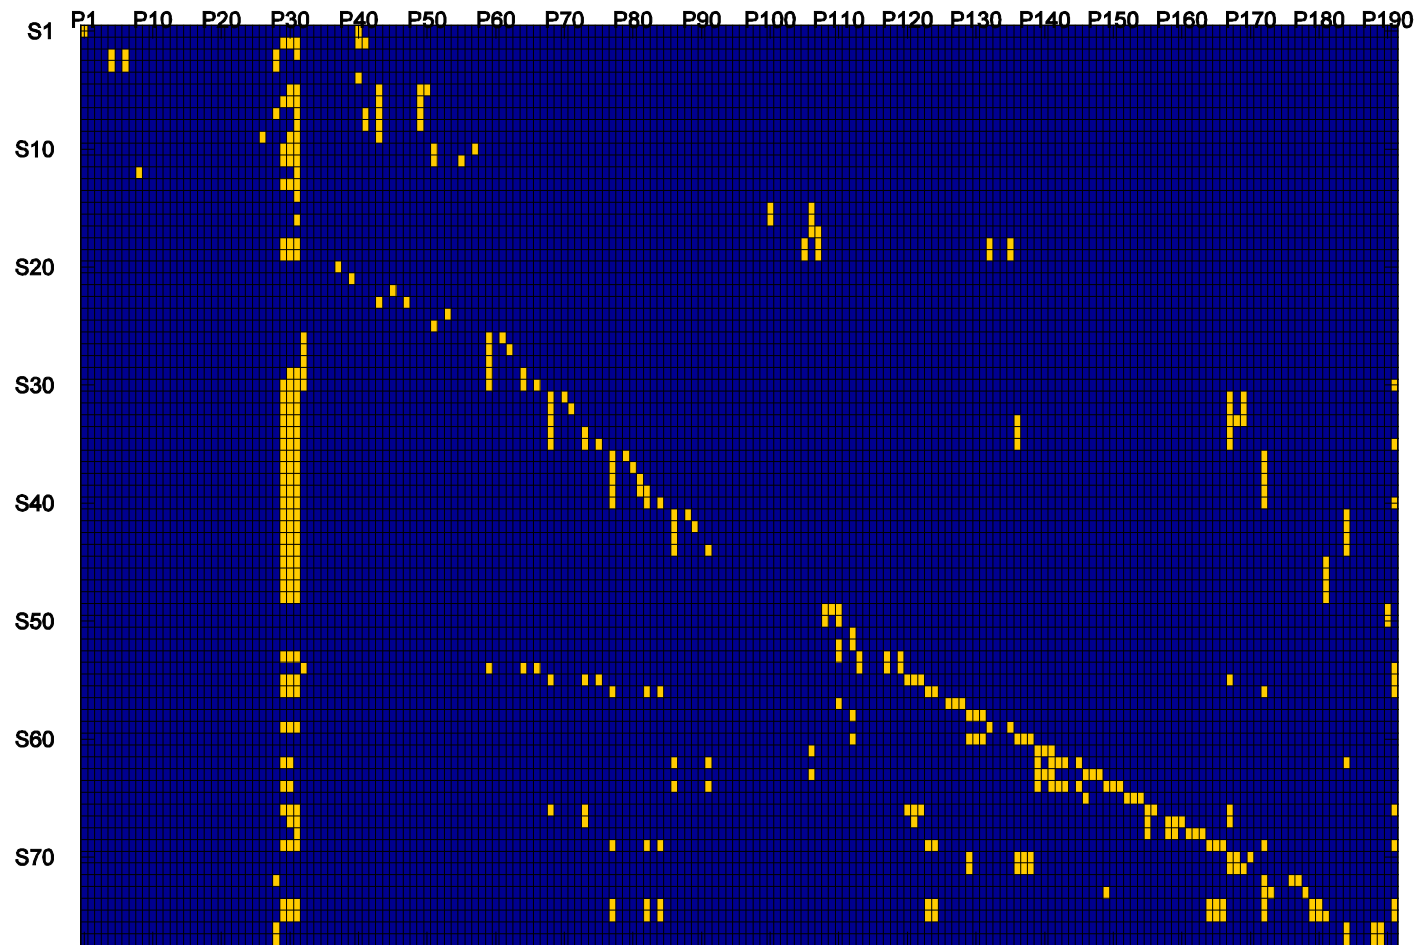

**Figure S6.** Global sensitivity analysis at 12 h. PRCCs with value  $>0.5$  are shown in yellow.

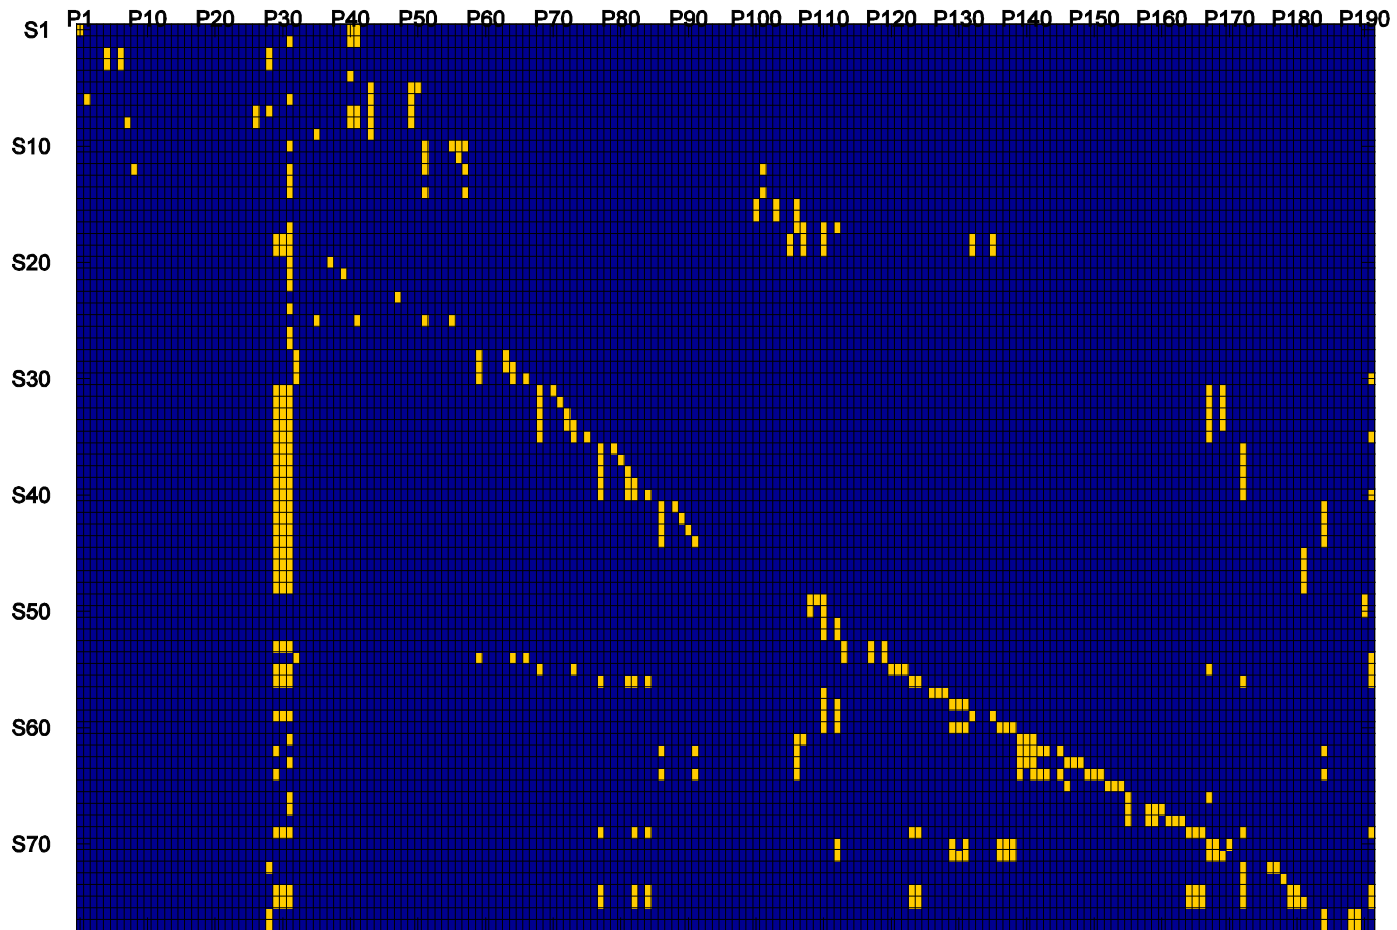

**Figure S7.** Global sensitivity analysis at 24 h. PRCCs with value  $>0.5$  are shown in yellow.

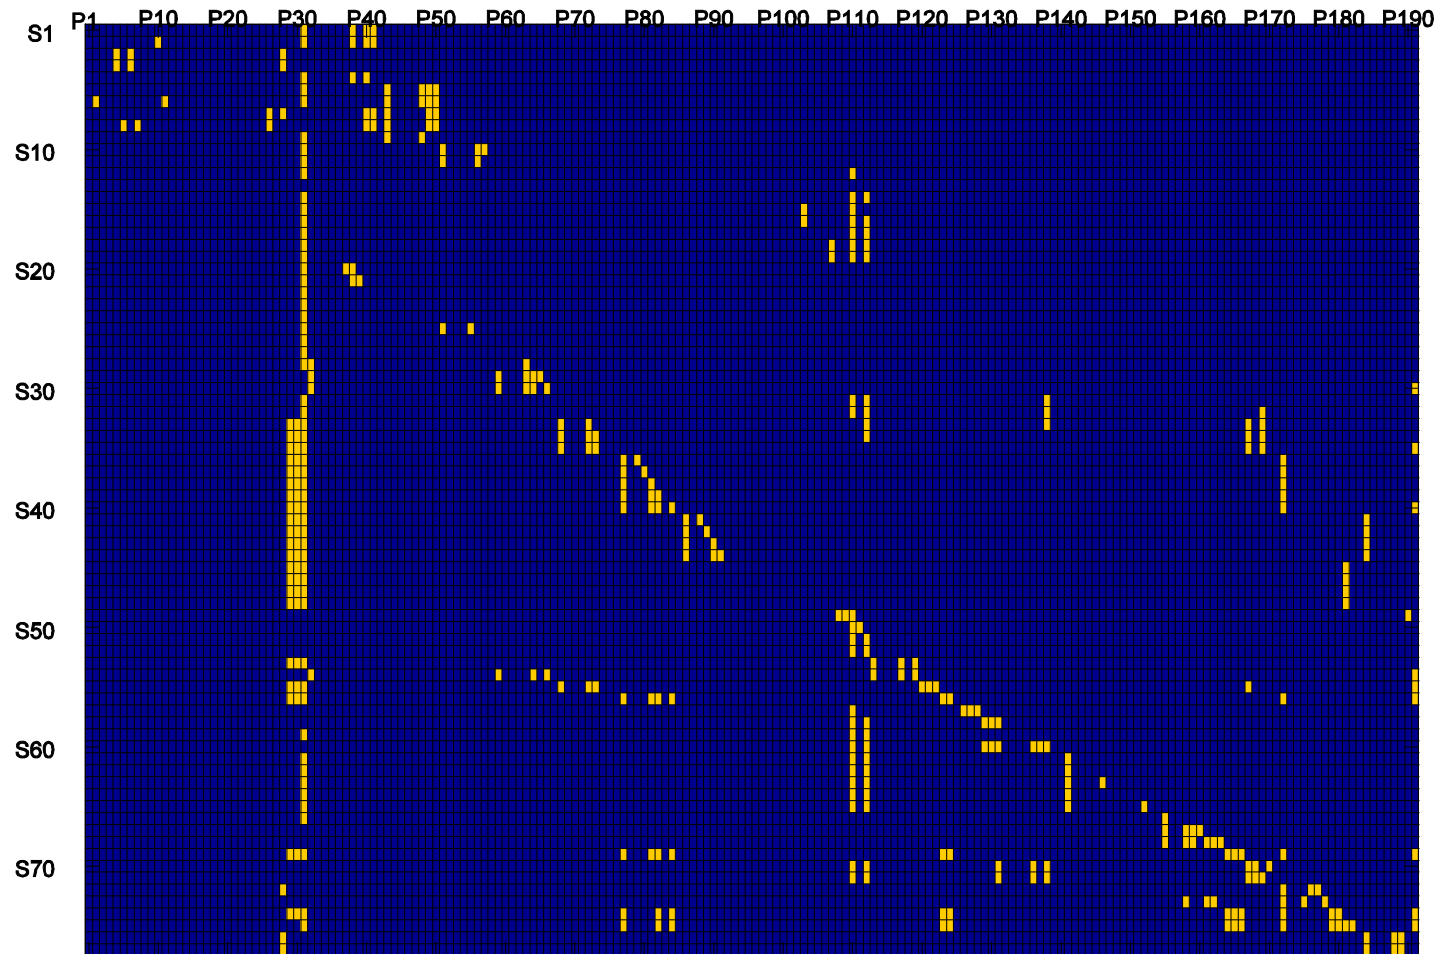

**Figure S8.** Global sensitivity analysis at 48 h. PRCCs with value  $>0.5$  are shown in yellow.

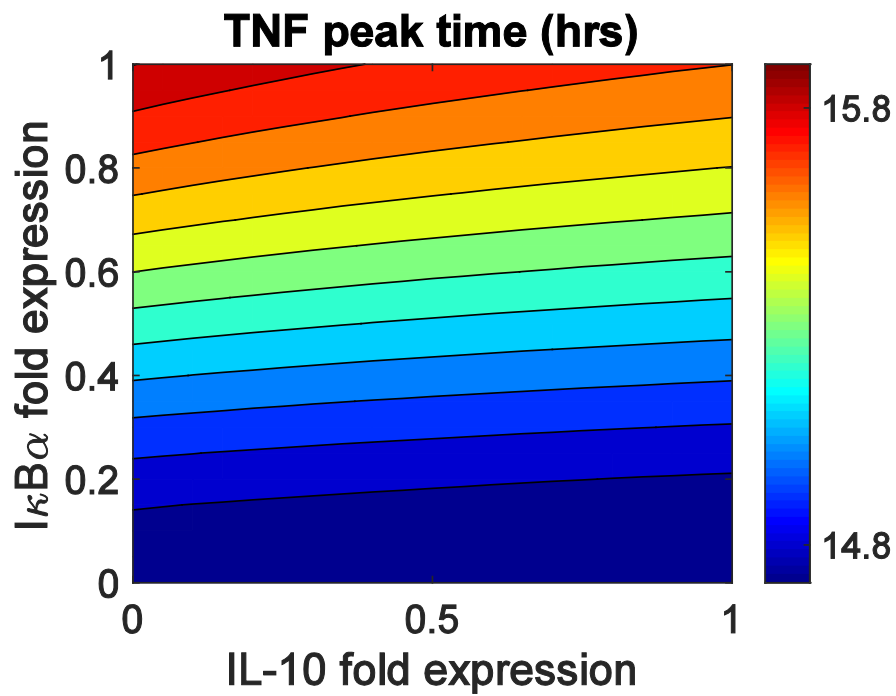

**Figure S9.** Regulation of the TNF trajectory. We calculated fold expression by dividing the values of the transcription rate parameters for I $\kappa$ B $\alpha$  and IL-10 by their default values. Modulation of I $\kappa$ B $\alpha$  and IL-10 expression does not change the timing of the TNF peak. There is only about 1 h difference in TNF peak time for any combination of the I $\kappa$ B $\alpha$  and IL-10 expression.



### 3. MATLAB Code Description

Correspondence about modeling- and software-related technical questions to Maurizio Tomaiuolo: mauriziotml@gmail.com

The MATLAB code for the macrophage extra- and intracellular signaling pathway model was developed at the DoD Biotechnology High Performance Computing Software Applications Institute (BHS AI), Fort Detrick, Maryland, to study the long-term interaction between intracellular pathways leading to the production of pro- and anti-inflammatory mediators (TNF, IFN- $\beta$ , and IL-10). The model simulates the kinetics of the extra- and intracellular species using a set of ordinary differential equations (ODEs). Local sensitivity analysis was implemented to verify the model robustness to local perturbations; this was supplemented with a global sensitivity analysis. The “System requirements” subsection (below) contains the details about the computer system that we used to develop and run the code. The rest of this document provides information about using the code to reproduce the figures in the paper.

#### System requirements

We used the following software and hardware components:

##### *Software*

- Operating System: Windows 7 Enterprise (64-bit operating system)
- MATLAB version 8.3.0.532 (R2014a) (64-bit operating system)

##### *Hardware*

- Intel® Core™ i7-3770 CPU @ 3.40 GHz and 8.00 GB RAM
- Disk space: 3-4 GB is recommended for a typical installation

We developed the code in MATLAB R2014a. It includes the following files:

**params.txt** – file containing the values of all parameters

**mmfn.m** – returns the value of the activator function

**mmrfn.m** – returns the value of the repressor function

**my\_ode\_timeout\_event.m** – stops computation if the ODE solver is taking too long

**getPeakTimeAreaSteady.m** – computes peak magnitude, peak time, area under the curve, and the steady-state value from a species kinetic trajectory

**rescaleTo.m** – normalizes a trajectory between two supplied values (min and max)

**tnf\_il10\_model.m** – function containing model equations

**figure\_2.m** – function that runs the model to produce Fig. 2

**figure\_3.m** – function that runs the model to produce Fig. 3

**figure\_4.m** – function that runs the model to produce Fig. 4

**figure\_5.m** – function that runs the model to produce Fig. 5

**figure\_6.m** – function that runs the model to produce Fig. 6 (takes a long time to run)

**plot\_fig\_6.m** – function that plots Fig. 6 using the output produced by **figure\_6.m**

**figure\_7.m** – function that runs the model to produce Fig. 7

**figure\_s1.m** – function that runs the model to produce Fig. S1  
**runSA.m** – function that runs the local sensitivity analysis (1% case)  
**figure\_s2.m** – function that plots Fig. S2 using the output produced by **runSA.m**  
**runSA2X.m** – function that runs the local sensitivity analysis (50% case)  
**figure\_s3.m** – function that plots Fig. S3 using the output produced by **runSA2X.m**  
**figure\_s4.m** – function that plots Fig. S4 using the output produced by **runSA2X.m**  
**figure\_s5\_s8.m** – function that runs global sensitivity analysis and plots Figs. S5-S8  
**plot\_fig\_s9.m** – function that plots Fig. S8 using the output produced by **figure\_6.m**  
**run\_tnf\_il10\_model.m** – master function that runs the scripts described above

### Instructions for downloading and saving the MATLAB files

The files are currently available in the “.txt” format. In order to run them in MATLAB, the file extension needs to be changed to .m, except for the **params.txt** file.

## Macrophage signaling pathway model

1. The **INPUT** to the model is the **initial concentration of LPS**. The default value of this parameter is 0.5 nM (corresponding to 10 ng/ml for a molecular weight of 20 kDa). This value is defined as parameter No. 191 in the “param\_values.txt” file found in the folder with the code.  
 To increase or decrease the input concentration of LPS, increase or decrease the value of the parameter in this file or run the “params(191) = YOUR\_VALUE” in the MATLAB command window, and then run the model.
2. To run the model, open **run\_tnf\_il10\_model.m** and click the “**Run**” icon  or hit the F5 key.
3. The simulation will run, and when it is complete, the paper figures will be displayed. Depending on the specific computer configuration, it may take a long time to generate all the figures. **figure\_7.m** and **runSA.m** are computationally intensive. If you would like to avoid running the code for a specific figure, simply put a % in front of the function call and MATLAB will ignore that line of code (as shown in the **run\_tnf\_il10\_model.m** file).

## Local sensitivity analysis

**Simulation:** To calculate the local sensitivity values in the vicinity of the default parameter set (the 1% perturbation case), open the file **run\_tnf\_il10\_model.m** and run the **runSA.m** function first and the **figure\_s2.m** after that.

**Output:** Displays Fig. S2 and returns four matrices containing the sensitivity values for all the features selected from the TNF kinetic trace. The matrices are stored in the workspace. The sensitivity values for the trajectory peak are stored in a matrix labeled **smax**. The sensitivity values for the area under the curve are stored in a matrix labeled **sarea**. The sensitivity values for the trajectory peak time are stored in a matrix labeled **stmax**. The sensitivity values for the steady-state values of the trajectory are stored in a matrix labeled **ssteady**.

**Simulation:** To calculate the local sensitivity values in the vicinity of the default parameter set (the 50% perturbation case), open the file **run\_tnf\_il10\_model.m** and run the **runSA2x.m** function first and the **figure\_s3.m** after that.

**Output:** Displays Fig. S3 and returns four matrices containing the sensitivity values for all the features selected from the TNF kinetic trace. The matrices are stored in the workspace. The sensitivity values for the trajectory peak are stored in the matrix labeled **smax2X**. The sensitivity values for the area under the curve are stored in the matrix labeled **sarea2X**. The sensitivity values for the trajectory peak time are stored in the matrix labeled **stmax2X**. The sensitivity values for the steady-state values of the trajectory are stored in the matrix labeled **ssteady2X**.

## Global sensitivity analysis

**Simulation:** To run global sensitivity analysis, open the file **run\_tnf\_il10\_model.m** and run the **figure\_s5\_s8**. Depending on the specifics of the computer used it may take days to run.

**Output:** Displays Figs. S5, S6, S7, and S8 of the ESI.

## References

1. S. L. Werner, J. D. Kearns, V. Zadorozhnaya, C. Lynch, E. O'Dea, M. P. Boldin, A. Ma, D. Baltimore and A. Hoffmann, *Genes Dev*, 2008, **22**, 2093-2101.
2. M. Fallahi-Sichani, D. E. Kirschner and J. J. Linderman, *Front Physiol*, 2012, **3**, 170.
3. J. R. Pfeiffer, B. L. McAvoy, R. E. Fecteau, K. M. Deleault and S. A. Brooks, *Mol Cell Biol*, 2011, **31**, 277-286.
4. T. Raabe, M. Bukrinsky and R. A. Currie, *J Biol Chem*, 1998, **273**, 974-980.
5. L. Ashall, C. A. Horton, D. E. Nelson, P. Paszek, C. V. Harper, K. Sillitoe, S. Ryan, D. G. Spiller, J. F. Unitt, D. S. Broomhead, D. B. Kell, D. A. Rand, V. See and M. R. White, *Science*, 2009, **324**, 242-246.
6. H. J. Shin, H. Lee, J. D. Park, H. C. Hyun, H. O. Sohn, D. W. Lee and Y. S. Kim, *Mol Cells*, 2007, **24**, 119-124.
7. S. Tay, J. J. Hughey, T. K. Lee, T. Lipniacki, S. R. Quake and M. W. Covert, *Nature*, 2010, **466**, 267-271.
8. A. H. Ding, E. Sanchez, S. Srimal and C. F. Nathan, *J Biol Chem*, 1989, **264**, 3924-3929.
9. E. Jaks, M. Gavutis, G. Uze, J. Martal and J. Piehler, *J Mol Biol*, 2007, **366**, 525-539.
10. S. Hao and D. Baltimore, *Proc Natl Acad Sci U S A*, 2013, **110**, 11934-11939.
11. S. Marino, I. B. Hogue, C. J. Ray and D. E. Kirschner, *J Theor Biol*, 2008, **254**, 178-196.
